# Supplementary material for: β2-subunit alternative splicing stabilizes Cav2.3 Ca2+ channel activity during continuous midbrain dopamine neuron-like activity
Source: eLife. 2022 Jul 6;11:e67464. doi: 10.7554/eLife.67464 (PMC9307272; doi:10.7554/eLife.67464)
Supplement: Figure 1—figure supplement 2—source data 1. [file elife-67464-fig1-figsupp2-data1.xlsx]

## Sheet: Table 1
Figure 1-figure supplement 2	Voltage-dependent activation																				Voltage-dependent inactivation												5s inactivaiton time course
Supplementary file 6	V0.5 [mV]				k [mV]				Vrev [mV]				act thresh [mV]				current density [pA/pF]				V0.5, inact [mV]				kinact [mV]				plateau [%]				r50 [%]				r100 [%]				r250 [%]				r500 [%]				r1000 [%]
	β2a	C3S/C4Sβ2a	β3		β2a	C3S/C4Sβ2a	β3		β2a	C3S/C4Sβ2a	β3		β2a	C3S/C4Sβ2a	β3		β2a	C3S/C4Sβ2a	β3		b2a	C3S/C4Sb2a	b3		b2a	C3S/C4Sb2a	b3		b2a	C3S/C4Sb2a	b3		b2a	C3S/C4Sb2a	b3		b2a	C3S/C4Sb2a	b3		b2a	C3S/C4Sb2a	b3		b2a	C3S/C4Sb2a	b3		b2a
Cav1.3L gating properties	3.6	1	5.5		10.2	9.4	9.4		77.2	74.5	76.9		-35.4	-34.4	-30.5		-9.9	-9.4	-9.1		-24.1	-25.92	-19.76		8.51	4.63	7.25		27.4	18.29	45.79		72.91	83.05	80.54		65.12	71.22	69.22		56.13	58.92	46.02		45.09	40.52	28.73		38.32
different β subunits	9.6	-5.7	-9.7		10.6	9.2	6.3		85.7	68.8	54.8		-30.7	-40.2	-32.4		-9.9	-2.1	-18.8		-22	-19.46	-21.23		10.15	6.88	7.44		55.46	28.77	28.49		89.78	81.97	95.64		80.9	64.36	85.98		74.1	44.99	62.63		68.62	32.51	47.02		63.56
(tsA-201 cells)	3.9	4.3	8.6		10.3	9.3	9.7		72.1	67.8	80.5		-35.8	-31.9	-28.5		-7.6	-15	-6.6		-6.04	-23.94	-18.37		13.75	6.48	8.61		41.54	27.9	15.97		82.59	77.89	83.02		76.2	70.85	73.06		60.12	58.24	59.51		46.41	42.45	45.77		34.74
	1	-0.6	2.5		9.7	9.3	9.1		75.2	68.3	72		-35.4	-35.8	-31.9		-8.7	-7.2	-11.9		-18.18	-21.88	-18.88		8.82	5.48	6.02		22.35	24.65	33.43		82.55	82.57	79.07		79.31	70.52	58.48		66.04	55.51	34.68		56.12	39.03	21.33		46.28
	8.2	5	8.6		9.8	9	9.8		67.4	83.8	67.4		-31	-28	-30		-4.6	-10	-11.7		-21.07	-23.08	-23.5		8.7	6.96	5.68		34.74	23.39	18.67		92.96	69.85	88.84		90.15	62.4	77.83		82.59	50.26	56.71		72.99	38.94	36.84		69.01
	8.7	1.2	7.5		11.2	8.4	9.3		64.3	67.9	69.9		-37.8	-30.5	-28.5		-11.8	-22.9	-11.9			-29.54				4.22				20.02			83.73	57.45	75.47		79.71	50.33	59.56		70.07	36.14	38.44		64.37	25.19	23.15		55.76
	11	-4.9	-0.5		11.3	8.7	7.8		72.6	68.9	65.3		-34.4	-37.3	-29.5		-8.2	-9.7	-9.2			-24.91				5.96				16.29			99.57	63.37	67.78		96.83	56.56	67.78		84.99	40.81	56.16		81.72	28.67	39.14		73.15
	10.9	-3.1	3.8		10.4	9.4	8.9		58.6	71.5	80.8		-32.9	-38.3	-29		-10	-5.6	-7.5			-27.12				5.88				17.77			98.83	74.6			92.45	62.27			88.92	42.46			80.25	28.22			65.67
	0	3.4	1.7		10	9.4	9.7		62.8	72	72.4		-39.3	-32.9	-35.4		-7.1	-16.7	-4.8			-28.57				4.83				10.17			79.68	59.24			71.76	49.92			63.14	33.32			53.21	18.9			43.93
	-1.2	-3.9			9.9	8.4			79.1	71.6			-38.8	-35.4			-6.3	-24.2				-16.26				8.74				17.88			85.49	75.72			79.29	57.61			69.06	32.24			63.95	20.86			55.82
	9.5	3.1			9.8	10.1			78.2	66			-27.5	-37.3			-5.3	-7.7				-27.6				6.59				32.26				81.97				63.34				44.31				32.92
	-5.2	-0.8			8	9.9			71	70.2			-34.4	-38.8			-4.3	-8																58.33				47.02				30.97				20.12
	10.8	-3.8			10.8	8.5			70.7	70.6			-33.1	-35.4			-10.1	-11.6																91.74				78.83				69.28				43.75
	-10.6	11.4			7.2	10.6			61.9	73.2			-36.2	-30.5			-5.6	-9.3																85.34				72.96				61.79				50.28
		-3.6				8.9				74.5				-36.3				-4.8
n-number	14	15	9		14	15	9		14	15	9		14	15	9		14	15	9		5	11	5		5	11	5		5	11	5		10	14	7		10	14	7		10	14	7		10	14	7		10
mean	4.3	0.2	3.11111		9.94286	9.23333	8.88889		71.2	71.3067	71.1111		-34.4786	-34.8667	-30.6333		-7.81429	-10.9467	-10.1667		-18.278	-24.3891	-20.348		9.986	6.05909	7		36.298	21.5809	28.47		86.809	74.5064	81.48		81.172	62.7279	70.2729		71.516	47.0886	50.5929		63.273	33.0257	34.5686		54.624
standard deviation	6.75357	4.67654	5.75792		1.12299	0.62868	1.14613		7.6187	4.27258	8.16279		3.26807	3.47659	2.26164		2.35792	6.29023	4.08656		7.16454	4.03712	2.0692		2.20151	1.28235	1.17803		12.95	6.46558	12.0091		8.46675	11.122	9.01433		9.62153	9.58707	9.7703		10.9981	12.1421	10.9136		12.9983	9.79236	10.3787		13.3331
standard error	1.80497	1.20748	1.91931		0.300131	0.162324	0.382043		2.03618	1.10318	2.72093		0.873428	0.897651	0.753879		0.63018	1.62413	1.36219		3.20408	1.21724	0.925372		0.984544	0.386644	0.52683		5.79141	1.94945	5.37063		2.67742	2.97248	3.4071		3.04259	2.56225	3.69283		3.4779	3.24512	4.12496		4.11041	2.61712	3.92277		4.21628
transfections (N):	2	2	2		2	2	2		2	2	2		2	2	2		2	2	2		2	2	2		2	2	2		2	2	2		2	2	2		2	2	2		2	2	2		2	2	2		2
C3S/C4Sβ2a = to disrupt palmitoylation-mediated membrane anchoring of β2a, the two involved N-terminal cyteines were replaced by serines																																	r-values: Remaining current (in %) after X ms --> e.g. r100 = remaining current (%) after 100 ms
[truncated: 5 more columns]
