# Supplementary material for: β2-subunit alternative splicing stabilizes Cav2.3 Ca2+ channel activity during continuous midbrain dopamine neuron-like activity
Source: eLife. 2022 Jul 6;11:e67464. doi: 10.7554/eLife.67464 (PMC9307272; doi:10.7554/eLife.67464)
Supplement: Figure 1—source data 1. [file elife-67464-fig1-data1.xlsx]

## Sheet: Table 1
Table 1	Voltage-dependent activation																																				Voltage-dependent inactivation
Figure 1	V0.5 [mV]							k [mV]							Vrev [mV]							act thresh [mV]							current density [pA/pF]								V0.5, inact [mV]							kinact [mV]
	β2a	C3S/C4Sβ2a	β2d	β2e	β3	β4		β2a	C3S/C4Sβ2a	β2d	β2e	β3	β4		β2a	C3S/C4Sβ2a	β2d	β2e	β3	β4		β2a	C3S/C4Sβ2a	β2d	β2e	β3	β4		β2a	C3S/C4Sβ2a	β2d	β2e	β3	β4	no β		β2a	C3S/C4Sβ2a	β2d	β2e	β3	β4		β2a	C3S/C4Sβ2a	β2d	β2e	β3	β4
Cav2.3 gating properties	-13.9	-14.2	-21.2	-10.1	-13	-15.7		4.5	4.6	2.8	5.1	4.1	4.7		37.8	39.6	33.4	42	40.1	35.9		-29.7	-30.6	-30.6	-28.4	-26.7	-32.7		-149.5	-110.8	-207	-44.3	-221.9	-68.9	-16.4		-51.422	-60.8007	-65.3289	-57.7217	-78.5878	-75.0687		8.81218	7.90769	7.70078	8.24076	7.04885	7.25377
different β subunits	-19	-8.7	-9.9	-13.9	-15.8	-10.9		5	5.3	5.9	5.4	4.1	5.8		30.4	43.1	44.8	41.6	34.9	42.9		-37.1	-27.8	-31.6	-33.3	-30	-32.2		-83.9	-18.5	-19	-42.2	-91.5	-18.9	-5		-39.8255	-63.1665	-63.3882	-36.4106	-78.3649	-73.4702		7.8846	7.38766	9.12337	3.85277	7.27406	7.73022
(tsA-201 cells)	-13.3	-22	-20.2	-14.3	-11.4	-12.1		4.7	2.8	4.9	5.5	4.7	4.5		38.3	34.2	33.9	37.1	39.3	38.7		-30.2	-31.1	-37.7	-34.4	-28.1	-28.4		-96.1	-135.2	-82.4	-108.6	-52	-154.6	-18.5		-40.9432	-68.5631	-80.771	-43.8409	-84.7399	-72.9763		7.7949	6.181	7.82241	4.33734	7.88154	7.09279
	-14.5	-24.2	-22.5	-11.4	-8.6	-15.8		4.6	3.3	4.4	5	5.2	4.2		35	31.4	28.3	43	40.5	36.2		-31.3	-35.5	-38.2	-29.5	-27.3	-30.6		-194.7	-248.4	-160.9	-93.7	-104.7	-101.5	-13.8		-35.4891	-68.6601	-77.5431	-43.4699	-77.2129	-68.0949		11.3673	9.10028	8.1862	6.62972	7.77531	7.81346
	-22.8	-8.3	-17.1	-17.8	-12.2	-10.8		5.6	6	4	4.3	4.8	5.3		28.6	42.7	35.3	37.3	39.1	39		-43.4	-31.1	-31.1	-32.7	-29.5	-30.6		-200.3	-16.4	-167.3	-144.1	-109.5	-30.2	-23.6		-36.933	-57.7508	-72.9328	-43.3824	-77.9958	-74.0818		8.23597	8.2156	7.96595	6.81758	7.38205	7.37817
	-10.6	-9.8	-14.2	-20.9	-8.6	-10.5		5.2	5.2	4.7	4.6	6.1	5.8		39.4	40.6	36.4	37.2	42.3	39.9		-29.7	-28.9	-31.1	-37.1	-31.6	-32.2		-74.8	-70.2	-126.9	-149	-15.8	-8	-10.7		-41.4764	-54.3465	-64.48	-38.6673	-76.6505	-65.2434		7.68436	8.79438	7.70014	5.81533	7.31162	7.63297
	-6.1	-13.2	-17.1	-17.6	-14	-12.7		5.4	5.6	4.2	2.7	4.8	4.4		44	39.5	35.1	44.3	39.2	36.1		-25.6	-33.8	-31.6	-26.2	-30.6	-28.4		-77.8	-19.9	-120.6	-97.8	-100.8	-145.1	-7		-47.3496	-60.2516	-75.3332	-37.6999	-71.1671	-62.8318		3.81861	10.1753	8.85007	6.33696	6.77523	7.62242
	-8.9	-15.6	-10.7	-10.5	-5.9	-15.3		5.8	4.5	5.7	4.5	6.1	3.9		41.9	36.1	42.1	42.1	45	36.1		-30.7	-31.6	-31.6	-26.7	-28.4	-28.9		-43.1	-102.6	-43.4	-70.3	-13	-106	-7.5		-43.1538	-65.6738	-69.7881	-44.4167	-76.6979	-71.3135		7.34247	7.54294	8.10419	5.25157	6.67619	6.90843
	-12.7	-8	-21.1	-21.3	-7.1	-15.3		5	5.4	4.1	5	5.4	5		39.5	39.8	33.8	36.9	43.5	36.8		-30.6	-27.8	-34.9	-38.8	-26.7	-32.7		-162.8	-175.3	-137.3	-124.4	-62.2	-56.8	-17.7		-37.301	-63.8031	-63.5502	-40.4705	-75.4717	-68.082		5.05456	9.56809	8.57674	6.34484	6.62051	7.83564
	-30.7	-18.1	-22.5	-13.8	-8.7	-14.2		3.3	3.2	2.9	5.1	5.8	5.2		29.2	34.6	34.3	35.3	44.3	40.7		-41.5	-28.9	-32.2	-32.7	-30	-32.7		-335.6	-171.4	-167.1	-65.8	-44.5	-31.8	-13.2		-31.0094		-65.556	-20.4449	-72.1881	-70.7914		6.81587		7.97689	6.44056	7.4676	7.17629
	-13.2	-6.6	-14.1	-15.9	-8.9	-13.4		5.2	6.2	5.5	4.4	4.7	5.3		32.1	42.3	34.7	39.6	40.4	37.3		-32.7	-30	-34.4	-31.6	-25.6	-32.7		-69.1	-47	-103	-69	-78.2	-110.2	-5.4		-33.1111			-39.9476	-73.5654	-71.8552		7.67532			5.78776	6.53691	7.65825
	-19.9	-18.5	-12.2	-13.4	-10.6	-12.1		4.6	4.3	5.4	4.2	5.2	4.3		34.6	34.3	45	40.2	37.6	39		-36	-33.3	-31.1	-28.4	-29.5	-27.3		-111	-153	-78.9	-73.7	-44.6	-154	-8.1		-46.1166			-35.708	-78.7543			4.58776			8.07311	6.19263
	-7.4		-9.4	-6.8	-15.4	-7.6		5.7		4.5	5.4	5.5	5.9		43.2		44.3	44.4	30.2	41.6		-28.9		-25.1	-26.7	-36	-29.5		-22.5		-21.6	-10.3	-46.5	-12.2	-13.9		-43.4193			-52.5604	-74.403			7.97114			7.76791	6.60801
	-23.7		-13.1	-10	-10.8	-15.5		4.2		5.2	4.9	5.8	4.2		30.1		39.3	39.9	40.4	36.6		-38.2		-31.6	-27.8	-32.2	-30		-261.5		-58	-186.3	-12.9	-97.2	-18.4					-28.4552	-71.4993						6.82646	6.97953
	-13.1		-13.1	-5.9	-6.6	-16.2		5		5	4.5	6	5.1		36.2		39.6	44.6	43	37.3		-31.1		-30.6	-22.3	-29.5	-34.4		-42		-69.7	-113.7	-25.6	-85.4	-10.1					-31.4713							8.99344
	-7.4		-17.7	-8.7	-8.1	-15.4		5.1		4.3	5.7	5.9	5.1		36.5		35.5	43.1	38	39.8		-26.7		-32.7	-29.5	-30.6	-33.8		-24		-160.1	-48.5	-7.4	-36	-5.9					-21.8099							8.238
	-18.2		-14.3	-25.7	-12.3	-8.5		3.2		4.4	2.5	3.6	5.7		38.9		37.3	35.8	38.6	40.1		-28.9		-30	-33.8	-24.5	-30		-202.5		-107.3	-367.6	-67.5	-54.4	-5.7					-49.0883							5.14125
	-9.7			-17.3				5.2			5.1				40.7			32.6				-28.4			-36				-147.9			-76.1			-12.4					-48.9686							5.7076
	-11.7			-7.6				5.2			5.2				42.5			44.4				-30.6			-26.7				-104.2			-38.7			-6.1					-47.4894							9.51806
	-10.4			-8				5.4			6.1				43			42.1				-30			-31.1				-25			-21.9			-5					-33.7746							7.88724
	-6.5			-9.4				5.6			5.5				44.1			42.6				-27.3			-30				-91.6			-43.8			-6					-36.0062							5.04935
	-22.2			-5.8				2.5			6				37			43.1				-30.6			-28.4				-155.3			-8.1			-9.2					-37.4195							5.42758
	-13.2			-20.1				5.7			4.6				34.6			41				-34.4			-36				-204.4			-344.4			-6.3					-51.0457							5.93434
	-21.3			-12.5				5.1			5.3				34.1			39.9				-39.8			-31.6				-169.7			-113.5								-37.5947							4.92175
	-14.8			-9.7				4.5			5.7				36.7			40.6				-30.6			-31.1				-150.4			-90.3
	-18.3			-14.5				3.2			4.6				36.7			42.7				-28.9			-31.1				-180.1			-26.3
				-20							5.8							37.4							-41.5							-77.7
				-11.3							5.7							43.7							-32.2							-69.6
				-18.2							4.7							34.5							-34.9							-46.7
				-16.2							4.2							39.8							-30.6							-96
				-18.9							5							36.6							-36.6							-176.4
				-22.1							2.2							42.6							-28.9							-59.1
n-number	26	12	17	32	17	17		26	12	17	32	17	17		26	12	17	32	17	17		26	12	17	32	17	17		26	12	17	32	17	17	23		13	9	10	24	14	11		13	9	10	24	14	11
mean	-14.75	-13.9333	-15.9059	-14.05	-10.4706	-13.0588		4.78846	4.7	4.58235	4.82812	5.16471	4.96471		37.1192	38.1833	37.2412	40.25	39.7882	38.4706		-32.0346	-30.8667	-32.1235	-31.4563	-29.2235	-31.0059		-129.992	-105.725	-107.676	-96.8094	-64.6235	-74.7765	-10.6913		-40.5808	-62.5574	-69.8671	-39.911	-76.2356	-70.3463		7.31116	8.31921	8.20067	6.47255	7.03786	7.46386
standard deviation	6.12381	5.85636	4.40319	5.25117	3.00349	2.69399		0.868252	1.12331	0.867637	0.9323	0.765622	0.636338		4.60852	3.90637	4.64678	3.27404	3.58432	2.14323		4.6013	2.41222	2.99969	4.11786	2.73257	2.09209		77.6586	74.0473	55.1982	81.1381	52.6786	49.2194	5.36842		5.82789	4.79416	6.3873	9.07829	3.60288	3.86063		1.9533	1.22795	0.491337	1.48035	0.497465	0.316747
standard error	1.20098	1.69059	1.06793	0.928285	0.728453	0.653388		0.170278	0.324271	0.210433	0.164809	0.185691	0.154335		0.903804	1.12767	1.12701	0.578774	0.869325	0.519811		0.902389	0.696347	0.727533	0.727941	0.662744	0.507406		15.2301	21.3756	13.3875	14.3433	12.7764	11.9375	1.11939		1.61637	1.59805	2.01984	1.8531	0.96291	1.16402		0.541748	0.409316	0.155374	0.302175	0.132953	0.0955028
transfections (N):	5	2	2	2	3	3		5	2	2	2	3	3		5	2	2	2	3	3		5	2	2	2	3	3		5	2	2	2	3	3	3		5	2	2	2	3	3		5	2	2	2	3	3
C3S/C4Sβ2a = to disrupt palmitoylation-mediated membrane anchoring of β2a, the two involved N-terminal cyteines were replaced by serines
