# Supplementary material for: β2-subunit alternative splicing stabilizes Cav2.3 Ca2+ channel activity during continuous midbrain dopamine neuron-like activity
Source: eLife. 2022 Jul 6;11:e67464. doi: 10.7554/eLife.67464 (PMC9307272; doi:10.7554/eLife.67464)
Supplement: Figure 2—figure supplement 1—source data 1. [file elife-67464-fig2-figsupp1-data1.xlsx]

## Sheet: Tabelle 1
Figure 2-figure supplement 1	Binding specificity β1 - β4 [Ct-values]								Binding specificity β2a - β2e [Ct-values]									Expression Stability (Panel C) [average pairwise variation]
	β1								β2a									Actb	B2m	Gapdh	Hprt1	Tbp	Tfrc	Sdha
B: Binding specificity of TaqMan assays	β1	β1/β2 (1:10)	β1/β3 (1:10)	β1/β4 (1:10)	β2	β3	β4		β2a	β2a/2b (1:10)	β2a/2c-d (1:10)	β2a/2e (1:10)	β2b	β2c-d	β2e			0.276028	0.759308	0.36212	0.57114	0.281988	0.468173	0.657927
C: Expression stability of endogenous Ctrl genes	22.7981	22.8161	22.9219	22.773	33.6715	35.5532	33.8918		19.7665	19.6711	19.692	19.6462	33.6971	38.118	33.3095			0.251837	0.998967	0.527737	0.513258	0.172174	0.387238	0.425482
	22.7641								19.6708									0	0	0	0	0	0	0
	22.8732								19.7001									0.536557	0.426306	0.69738	0.532431	0.508385	0.776401	0.737999
																		0.554559	0.154768	0.439784	0.0367899	0.258263	0.347432	0.277815
																		0.463061	0.847393	0.656464	0.485855	0.45243	0.736325	0.685351
	β2								β2b
	β2	β2/β1 (1:10)	β2/β3 (1:10)	β2/β4 (1:10)	β1	β3	β4		β2b	β2b/2a (1:10)	β2b/2c-d (1:10)	β2b/2e (1:10)	β2a	β2c-d	β2e
	23.7724	24.0165	24.1634	24.0141	34.7796	34.6567	33.8885		17.9268	18.0346	17.9603	18.0751	33.8503	29.7744	31.55		n-number	6	6	6	6	6	6	6
	23.8888								17.9728								mean	0.347007	0.531124	0.447247	0.356579	0.278873	0.452595	0.464096
	24.131								18.0313								standard deviation	0.213066	0.401421	0.253041	0.26368	0.185681	0.284875	0.287445
																	standard error	0.0869837	0.163879	0.103304	0.107647	0.0758039	0.1163	0.117349
	β3								β2c-d								preparations (N):	6	6	6	6	6	6	6
	β3	β3/β1 (1:10)	β3/β2 (1:10)	β3/β4 (1:10)	β1	β2	β4		β2c-d	β2c-d/2a (1:10)	β2c-d/2b (1:10)	β2c-d/2e (1:10)	β2a	β2b	β2e
	22.5945	22.7441	22.7641	22.5868	33.8514	32.5728	31.8512		19.9968	20.1328	20.184	20.1617	34.0089	29.3199	29.274
	22.5154								20.1922
	22.6449								20.1146
	β4								β2e
	β4	β4/β1 (1:10)	β4/β2 (1:10)	β4/β3 (1:10)	β1	β2	β3		β2e	β2e/2a (1:10)	β2e/2b (1:10)	β2e/2c-d (1:10)	β2a	β2b	β2c-d
	23.6737	23.7231	23.7556	23.6317	36.1446	35.1355	33.5838		19.8571	19.8239	19.7341	19.8942	33.6295	31.8444	31.9917
	23.6288								19.9811
	23.6878								19.8209
