# Supplementary material for: β2-subunit alternative splicing stabilizes Cav2.3 Ca2+ channel activity during continuous midbrain dopamine neuron-like activity
Source: eLife. 2022 Jul 6;11:e67464. doi: 10.7554/eLife.67464 (PMC9307272; doi:10.7554/eLife.67464)
Supplement: Figure 2—figure supplement 2—source data 1. [file elife-67464-fig2-figsupp2-data1.xlsx]

## Sheet: Table 1
Figure 2-supplemental Figure 2	β2 mRNA			Figure 2-supplemental Figure 2B	β2a		β2e
Supplementary file 4	0.132506			Supplementary file 4	SN DA	VTA DA	SN DA	VTA DA
β2 relative mRNA level in	0.0318531			β2a / β2e mRNA levels in	5.03	5.15	7.95	6.57
UV-lasermicrodissected SN DA neurons	0.30494			adult wildtype mice	4.09	4.2	7.18	6.8
(juvenile wildtype mice)	0.233864			(RNAScope)	4.98	4.59	10.29	9.09
	0.284354				4.73	4.06	11.82	11.84
	0.00819776				4.41	4.75	10.21	7.78
	0.322169				5.1	4.94	10.65	8.48
	0.183872
	0.0307748
	0.0190592
				number of preparations (N)	6	6	6	6
				mean	4.72333	4.615	9.68333	8.42667
n-number	10			standard deviation	0.400283	0.422126	1.75592	1.929
mean	0.155159			standard error	0.163415	0.172332	0.716853	0.787509
standard deviation	0.127081
standard error	0.0401866
preparations (N):	2
SN = Substantia nigra
DA = dopamine				SN = Substantia nigra
				VTA = Ventral tegmental area
				DA = dopamine
					n
					Cavβ2a SN DA						Cavβ2a VTA DA						Cavβ2e SN DA						Cavβ2e VTA DA
					1	2	3	4	5	6	1	2	3	4	5	6	1	2	3	4	5	6	1	2	3	4	5	6
					3.50754	3.05092	5.33642	9.22544	5.67701	6.14852	2.7237	4.49161	1.16937	8.71107	4.09805	3.81966	5.2697	9.79009	10.2516	1.52468	3.72569	6.14478	4.3646	7.85859	4.83896	9.55343	4.75804	3.33768
					1.75537		7.40482	7.91601	2.66582	5.29101	6.08663	1.15916	1.7241	1.87529	6.19569	5.69014	2.73056	2.5232	17.1186	0.983082	3.80417		6.1401	10.4342	1.40462	18.6904	0.472083	2.68442
					4.39364	21.7779		7.54332	6.43158	2.92211	0	6.08167	2.32926	2.92319	6.30066	9.79299	1.87424	6.94752		2.33106	5.60662	8.90472	7.23835	16.632	7.06202	8.85096	3.87121	1.75583
					3.44146		3.987		5.52319		6.93718	2.94371	2.82342	5.6679	9.24906	6.75985	3.36025	0	20.8729	3.44321		10.5473		16.2252	8.57055	11.7451	10.2688	5.51324
					5.08382	2.33217	4.49177	3.81183		4.76889	10.1986	6.10675	1.33821	5.31758	6.79946	4.33582		9.94092	15.1506		10.6492	10.2192	2.99592	15.0732	2.44488	12.5112	6.67514	7.29825
						5.63701	6.36454	3.067	3.07666	6.24768		3.15669	1.14272	5.49283	4.55057		9.9588	9.17776		8.10038		12.0095	4.13913	16.8728		22.4511		10.7875
					3.43665	5.11206	2.02915	4.11749	1.83964	5.06134	3.36438	4.21474		5.04713	5.46278	5.69947	5.45551	8.55528	17.5322	10.8733	2.66015	10.9107	5.9141	10.0822	5.50673		16.047
					6.93107	6.18498		0.662984		3.71402	9.33536	2.50317	10.4347			5.69898	6.4013			9.4877	8.44081		4.36004		5.17763	6.65887	9.15065	2.37868
						6.477	3.49139		0	5.94587	3.02141	1.76184	5.22437	3.58987	2.08785	5.95824	17.9319	7.81758	11.2553	18.4791	13.8944	17.1535	8.8741	11.0147	1.64253	4.04671	12.1854	0
					2.10231		5.67353	5.68407	3.85359		6.24455			0.617427	7.07683		9.4045	9.29431	8.49308	6.28634	4.62236		2.29041	2.03517	0.993172	8.65415	12.1805	5.88211
					4.75564	4.67662	6.97909	0.704349	4.25072	5.76941	3.26374	6.62475	7.57761	2.97261	4.61853	6.15415		9.71342	8.13654	8.398	9.25553	8.77246	4.88819	9.38481	4.43981	5.7601	13.0453	7.04279
					4.66099	4.73636	6.67919		2.08136	3.78236	3.3817	3.4159	2.17976	2.39098	5.13908	4.61329	9.75468	6.89747	10.4236			1.6991	8.85167	7.98675		7.85117		5.91059
						3.65276		2.47606	2.43424	5.03722	4.33163	6.2489	4.05555	2.86767	4.25727		17.0837		13.423	9.11543	1.74607	3.56153		13.0193	8.41751	14.7153	11.2141	2.446
					9.48849	2.43299	8.02811	3.44025		8.49434	5.79612	3.25572	7.18167	2.57958		7.90493	10.3528	1.56902	13.7575	10.6723	6.94444		8.84499	11.1677	13.4019		5.35239
					7.22945	2.92506	4.36677	0	2.94448	5.54354		5.86935	8.62766	0	3.25005	9.42126	9.91764	4.34358		21.6644	6.10832	5.12276	6.74415	7.33351	7.3874	1.62298	7.66099	8.51147
					4.12616		6.00862	1.91234	1.52693	5.22292	4.08321		5.5359	1.7622	4.42987	16.735	14.1497		4.66703	19.0066	7.75034	7.36492	5.48962	13.4462	13.4513	2.98061	7.20441	5.90452
					9.65932	2.15637		4.72606	2.8514		5.51106	4.80508		2.12364	7.54825	8.97393		12.0082	4.34289		5.96158	6.90005	4.31656	17.0673	11.1947		6.11347	4.151
						1.50113	10.3625	4.75057	1.69785	4.60798	0.652408	4.20875	6.12401	3.91517	2.58076	7.91644	8.64641		9.3254	9.56976	5.84246	2.15116				9.43942		5.17557
					6.85078	3.5058	3.88525	5.71233	1.86365		6.73269	4.35135	5.68334		7.1916	9.42285	8.05068	6.01244	10.8468	8.3307	7.57419	7.45747	6.86342	5.95538	14.0884	7.85214	2.71862	5.21931
					7.43087		0.366987			8.61702			8.37935	2.50935	1.97719		10.7102	9.70827	16.1605	11.7855	9.45252	10.893	5.54095	3.38529	9.07309	18.7729	6.51403
					9.11806	2.58955	5.22946	2.04931	0.673847		1.94399		4.17885	2.79127		9.75357	14.1482	13.9145		14.6397		12.779	8.36338	3.78088	8.97341	20.2028	8.3111	6.20668
					6.45138	2.58874	5.48146	4.64232	2.52269	6.387	4.11699	7.69163	1.39983	6.21278	4.62118	8.06402		12.7907	4.09978	8.05085	5.37347	13.3309	8.28517	2.67306	5.32006		3.09441	5.30593
					1.91097	4.76518	8.57018	2.02239	4.0664	2.56805	5.3813	3.34528	7.28998	5.42177	5.78085	5.37446	8.05525		3.02039	15.7237	4.58435		2.17781	5.20298	16.9658	1.16935		2.21723
					5.55871	2.60873	8.4299	1.09009		1.30839		1.58412	10.9322	3.38678	6.75924		13.2728	8.01968		12.4072	8.38185	7.41935	11.4825			5.96751	6.83273	4.98663
					7.89895	2.62913			3.72723	13.0228	12.1153	1.28238		2.79604	2.3125		7.96855		22.4021	16.0606	7.09438	9.0454	13.1937	2.68354	5.84514	13.1863	6.79238	4.58528
						0.869876	4.65115	3.75674		7.74125	6.63766		9.79312	1.63595	2.17654	7.67121	14.5602	8.05639			10.4405	3.75259	8.28899	5.02698	15.0692	0	12.0723
					8.76647	2.01197	1.23953	3.06949	7.66	8.81767	6.2689	1.0662	0.97698	2.08321			9.67148	8.86733	7.18349	4.09613	11.5989	8.9131		5.48176	14.7792	3.28275	12.1064	9.79778
					5.81666		5.00866	3.55	5.56532		7.36907	0.91379	4.22047	1.69202	0.0898685	2.12249		8.52682		5.35249		11.8645	10.4222	3.19457	6.32559	9.90104	12.1974	12.1199
						2.65795		3.25933	3.42691	5.74679	7.38451	6.89627	5.5313	6.84099	4.67537	4.36996	14.9031		14.2714	13.6278	9.98881	10.8678	15.7986		10.7908	2.86022	16.2326	14.8086
					5.38247	1.69579	5.67084	5.99574	4.54457	13.3187	8.21884	7.21007	4.89151		4.01721	5.22466	9.32772	9.31362	13.3674	5.34086	11.4887		4.43669	1.16271		6.62003		14.247
					4.80894	4.63341	4.47733	0.909392		10.7808	15.6557	3.45737	0	0.938835	1.14147	9.71876	16.4228	12.2679	14.2016	7.13466	6.32701	0.378291	7.27405	2.41527	8.80842	10.5007	1.80525	17.876
					4.91079	5.7365		2.27192	2.40065		3.4835			1.59908	5.61538	6.5238	10.4106	11.992		5.42467	7.14622	7.31147	5.76483	0.977667	14.0115	11.8577	1.232	17.4774
						4.25701	6.47562	0.734155	1.47637	9.35281		3.84339	2.1398	3.58684	4.079		8.12552	10.3456	12.229	7.02889	16.5192		5.94397	8.09828	16.1413	9.7597	3.28955	18.9125
					3.42691	5.37342	3.48966	5.08114	4.48844	13.1543	6.2072	10.9105	2.78486	2.53527	2.81822	9.44007	7.63664		16.6845	8.14276		15.3399	9.54408	8.1396		14.6666	7.59615
					3.27869	4.63223	4.15575	4.2307	3.92916	5.25076	4.51537	4.75215	2.2453	0.740432	3.53731		18.2928	6.73496	6.63612	9.24006	3.04733	15.198	12.7753	4.2417	7.08843	9.50289	5.91961	5.83793
					1.28877		3.22061	6.04737		11.5145	5.39337	6.84809	4.28638	3.26746	1.48286	5.8067	6.67398		11.7965	7.50167		12.4463	8.94058	7.3376	5.16046			7.41144
						2.47825	5.5905		6.06758	9.20049	14.6155		6.80299	4.72448	2.95563	6.00057		6.91407	13.9657		9.6842	12.3734		10.6205	3.20015	7.7009	4.86225	9.27211
					0.0621427	0		3.65245	2.73084	4.80091	4.71087	6.31171	6.18696		4.67091	9.21811	13.4242	5.54324	20.2428	6.08195	10.767	13.4579	5.38157	11.7994	8.66189	17.1825	8.83666
					2.02472	2.34773	5.04581	1.56274	3.99693	2.08022		8.31983	1.5018	8.9827			5.83356	3.81862	8.7232	11.5832	5.99623	14.261	3.012		1.12738	3.63943	14.774	6.23211
					6.9462	1.83579	7.82669	2.67364		8.20399	2.9073	5.09647	2.22297	2.55343	2.82152	6.58653	9.18353			11.1877	10.7107		5.76635	4.55032		9.20149	14.5328
					2.07123		4.86022	6.64761	4.32969		4.40771		2.21456	8.54784	0.80688	1.58469	11.8636	2.44962	3.97786	15.1069	6.50625	8.08497	1.62779	7.87695	9.86318	16.7421		2.18465
					4.62425	3.92549	4.39377	4.46828	1.26498	1.56405	4.18115	3.5302		5.80588	0	6.26877	12.1947	7.51159	15.338		6.42896	5.00078	8.23425	15.1354	12.6529	9.58313	3.18538	2.60977
					4.67584	4.22359	6.86623	4.66384	4.9941	4.53907	7.11343		6.32329	3.63643	2.4658	3.78251	15.456	6.69277	10.6465	14.6		6.34601	0	12.9776	16.6745		0	7.70112
							1.54973	4.65341	5.96343	4.24343	5.62488	5.0955	4.76853	5.33419				4.61914			9.97889	10.4982	12.1597	11.8961	13.5351	22.3045	8.43605	14.21
					3.93759	0.769147		7.69397	1.97255	2.34262	2.30382	1.1822	8.22956	6.884	4.60898	6.01481	10.2667	8.75512	7.50515	20.5147	13.3119		6.28484		10.6375	16.0094	4.09902	6.98355
					4.44799	2.59287	2.39997	3.01469		4.13095					10.7128	2.6346	4.78407		8.58434	6.34954		2.01469		17.464	16.8874	22.7842		10.1496
					2.99885	1.61973	4.05846		8.78623	4.19592	5.40255	5.24858	9.50522	2.69667	5.74765	1.56158		6.8589	9.40271	12.0063	7.88407	5.28268	6.05561	12.5039	7.82559	15.5247	5.28199	12.144
					2.79337		7.4928	1.81887	4.55257	1.28478	9.99798	3.44531	5.20945	2.72486	9.38322	4.69584	3.68034	8.64652	8.91376	17.3943	14.0771	3.78615	8.24583	19.9169	15.3058	8.30826	5.40317
					3.30167	4.19966	0	1.29955	4.88279		4.38538	8.09195	5.37797	3.10258	4.85732	9.97385	11.0769	4.18993	6.6027		18.474	5.07261	6.13516	21.0345	15.8525	19.293	7.11009	2.64825
					3.58582	3.10104	1.46565	1.2063	8.59152	1.61173	6.21898	3.24381	2.81165	0	15.7525			7.19546		9.12441	17.6315		6.33636	9.33861		25.1446	9.85165	5.56135
						2.84444			4.73326	8.48179	10.7564	6.5502	6.14961	4.736			8.85329	7.49417		11.7649		12.3836	5.31227		6.81181	19.0182	11.5962	2.92375
					0.688916	7.10347	6.06503	4.1944	4.86278	5.05909			4.63026	1.716	3.77705	2.86045	9.64825	10.738		11.4529	5.92341	16.3583	7.056	1.94368	10.0141			5.05657
					2.74695	3.91438	3.42453	6.00232	5.52244	13.1275	3.13931		6.06233		1.32642	3.51825	9.92085	11.6032	6.11283		7.32413	8.37234	8.18086	3.0326	11.7458	21.3576	12.006	3.76744
					4.93343		4.89214	6.92933	5.27503	4.9337	5.19282	5.68909	6.66973	5.82517	3.62878	1.77374	4.64019		14.3273	14.3712	5.24653	18.5166	2.67899	7.92028	14.8262	22.9453	5.91342	6.27814
					5.55299	3.62365	5.34313		4.04972		4.39167	0.934599		5.81924	5.28013	1.19169		2.51419	12.7903	18.8925	13.3351			5.5397	11.8541	29.4224	10.9407	7.31288
					3.47537	3.64706	4.49954	3.90815	6.40314	8.70121	4.47273	5.59632	6.61165	0	4.76284		18.8365	2.41578	14.6896	14.6008	5.93252	5.76839	4.91696	6.13611		22.211	12.2653	10.7441
					8.09817			1.38488		7.45148	7.70165	1.48925	8.85716	7.64974		4.52313	7.38309	4.88995				15.8602	5.82147	13.052	4.61429	22.5694	9.94124	3.35969
					3.9191	6.25491		2.27754	0.719263	2.97466	6.05093	4.19166	3.01543	3.1976	9.03673	4.12401		3.88274	13.1551	25.5162	10.0503	13.4036	7.10312	7.01661	10.281			11.7029
					6.32061	5.42732	4.28043	3.65681	6.14365	8.33048	3.13702	3.93749	8.3451	2.32105	3.19974	2.88334	4.87849	7.2151		26.9775	3.91309	11.987	7.1375	6.60737	12.8925	16.4238	4.27201
						5.51442	3.41266		3.24616	5.39811	6.89716		4.53985	6.27638		3.84153	5.08873	3.13246	6.1399		9.57917	12.7925	2.4923	11.7126	14.3168	12.0742	4.3243	7.2079
					3.0371	4.23968		7.09011	3.17848	6.15045	7.02835	7.48585	10.4358	3.68609	9.61854	0	8.56013			4.77926						11.0193	6.53932	7.11373
					4.03104		6.47391	11.1062	4.5233	7.49129	3.98002	7.83754		0.919461	2.45889	2.75624	4.01641		17.9475	6.4525		9.52144	2.48661	10.6644	6.12145	15.9281	8.57162	12.5384
					4.53592	4.29415	5.546	7.65084			3.59631	5.40818	5.37576		9.74584		0.543796			10.0943		7.79089	0.980843	5.72838	9.2864			5.7029
						7.55858	6.20456	11.5967	4.03883		4.75978	6.00635	3.12602	5.2404	4.37934	5.96184	8.18795	3.99779	1.38281	14.4257	7.15618	6.56165	0	8.36118	4.91693	12.0997	3.52495
							10.0053	11.3945	7.5007	2.75903		10.823	9.04811	2.63053	2.0374	4.98768		10.7047	4.3472	14.0543	12.2492		3.21719		12.9566	10.0477	8.02005	9.43462
					3.87654		13.5114	11.5358	4.71127	5.96718	0.903802	13.696		0	7.88662	7.82444	6.62526	9.53586	6.17543	9.43054	9.99708	4.74776	0.407934	12.2395	11.1357	9.78725	7.37686	9.29827
					4.94743	0.946474			3.68787		7.82854		7.09041	6.67997	3.31021	4.56534	2.47669			8.2192		7.05707	2.0381	16.0651	6.89376	9.87024	6.46958	8.25891
						2.35083	2.17836	1.54803	2.45711	2.55992	3.76488	1.47141	5.55297	4.40018		0.994283		6.64563	12.3906	18.9882	13.7412	7.58294	4.11335	5.4889	4.73919	9.6746	6.20641	7.75861
						1.03822	4.42609	0.718448		3.00681		1.60088	6.45416	2.4943	4.85621		0.710388	6.22106	8.74317	14.5774	15.2516	8.27498	2.38716	13.1253	9.13348	16.4369	6.74367
					7.2333	4.55544	3.80144	4.81621		1.30135		1.1305	6.79144		7.20454	5.51428	0.599417	6.20146	15.6885	14.1617	16.6742	10.3299	2.90411	7.22996		12.165		2.93124
					4.66176			3.58432	6.64171	4.99721	1.87807	3.81674	7.96948	2.27037	6.82306	7.5171		9.43227	8.89977			12.0937		8.02503	2.79163	13.9777	3.94865	3.56146
						0.732007	3.94338		6.74962		4.68284	2.66754		8.01246	3.08594	6.0372		6.54293	10.7639			11.4262	3.13982	11.5334	2.82905	14.8809	3.7944	0.582038
					2.07772			4.28883	10.8936	5.31232	6.25388	3.04019	3.66242	6.25109	0.753721	3.53487			22.6766		9.10846		7.13667	4.07827	6.53128	17.0468	3.78222	5.07896
					4.91745	6.39247	2.39793	2.19386		6.22062	6.55201		7.10979	2.23969	5.76143	6.2344	4.77246	9.05729	11.7098	12.8694	5.03079		15.3718		7.47857		8.75809	9.73483
					3.49501		5.95442	5.46128	5.70199	5.42267	0.98133	2.15381	0.692032	4.14899	5.43852			11.0901		9.27194			5.47979	5.82175	9.54108	16.0463	1.52449	11.9168
					12.3617	9.92627	2.65207	2.75535	4.3568	4.52337		0.0411066		8.1716	9.84039	7.81031	5.11987	12.1031	4.82723	21.2235	14.2369	6.03681	5.90775	5.30322		8.31794		9.32734
							7.00161	6.84321			6.17911	0.71184		2.62917	6.12303	6.45811	3.17868	4.23177	6.3971		9.84079	18.3252	8.70706	10.5096		5.82716		3.88337
					3.47732	2.53695	7.38314		10.3529	6.2737	2.72513	2.68238	2.24354	4.01313	3.61172		7.82335	15.2762	6.2644		17.4668		6.77574	8.21144		8.52173		6.69962
					3.99445	1.55111				7.42444	7.81115	2.50501	5.26766	5.4423	7.59204	1.62111			7.60395	5.75298	14.7985	11.5651	13.8395		4.38873	7.34178	8.30766	3.75933
						3.33629	1.42203	3.46785	4.80116		5.82439	4.3756	3.80156	3.8572	6.41721	1.14126	16.3089	0.476361	10.2906	11.5452		5.78094	3.95433	6.1869	8.16229		6.16232
					6.10846	2.00563	1.10517	2.4275	2.97309	2.88122	2.79728					3.05819	16.9321	7.38543		13.8553	17.065	8.71928		2.66783	7.9667	10.1405	3.47972	7.46842
					5.14603	1.73495	3.41015		2.762	5.24536	4.00074	4.1319	8.56091	5.50072	5.19339	5.40595	5.82561		11.0238	13.48	13.5119	12.49	3.00639	0.902496		9.86862	4.07903	3.70437
					4.95196		3.96244	6.79321		4.08886	10.1217	2.36588	5.51615	3.2742	3.75559	3.53102	20.5472	7.70015	11.3719		7.34962	10.9169	16.2302	3.6066	11.1675	16.1495	9.52564	11.3189
						5.30217	2.8084	3.57164	6.6782	4.23586	4.79489	4.26346	2.27502	3.99256	6.72984	0.81635		5.13923	3.61787	8.39393	4.68438	9.79865	6.06295	6.18694	7.26626	11.1518	11.396	7.63851
						3.44245	2.12026	5.85722	7.34712	2.84681	6.56449	0.431212	1.62726	10.4691	1.74634	2.06546	6.93828	7.7789				15.1422	1.65436	7.27207	10.6606	1.26263	3.72913	6.54242
					3.59147	10.2187				4.71257	8.43779	2.22302	0.723115	2.28133	1.99795	2.1003	5.96876	5.52998	13.5557	4.28028	3.87494	10.1637	5.41208	3.96288	10.6612	6.45564	5.40657
					9.2131	5.76114	3.39698	5.80573	3.19775	5.15298		4.04534		5.27632	3.87074		7.23389	6.41497	16.7819	7.22415	9.99834		6.88921	10.0559	11.0471	5.36247	6.93983	6.61575
					7.91577	7.96283	3.57254	5.20209	3.39213	9.78666	3.63392		1.34828		5.72526	0		10.4145	13.0313	16.8206	16.1661	9.31548	0	5.47662	6.77343	8.66944	9.07944	2.76033
					6.56091		4.82209	6.1406	3.44795		5.63112	2.05897	7.34256	7.64113	5.69483	2.00967	6.88725	4.1389		8.75884	11.9864	13.0412	8.81006	9.10847	12.589	10.196	12.6738	5.17754
					6.0382	3.69611	4.16374		7.13541	4.47271	6.82631	2.11897	5.10937	1.11636		0	8.24534		26.9779	16.3853		17.2092	4.19791	6.65579	10.6055	14.3625		4.29119
						1.22971	5.84924	6.72288	1.72006	5.03548		3.7088	4.06961	5.14881	2.69954		2.64909	4.65772		11.8143	10.5449		5.90044	0.992433	2.8324		5.35702	3.93046
					5.33112		6.14155	6.36775	3.83858	3.42244	3.80732	1.84454	2.35268	4.68551	2.15107	5.34133	2.39989	4.92151		15.3024		10.0609		4.74316		7.50175	9.81199	7.26838
					5.60656	2.83125	4.73146	10.2696			6.70728	1.1641	3.6836	3.94064	1.88724	4.41794	2.27759	6.44287	9.81114		14.7777	17.535			7.80066	3.80089	5.64424	7.34815
					3.82102	3.72491		11.5743	4.81569	4.58138	7.30528		2.53245	2.63159	2.91408	5.44519		7.76133	12.101	6.48853	11.1705	25.6303			4.40325	0	5.69619
					6.94122	1.57891	10.7075		8.20807	2.22377	7.31626	3.86819		6.49212	2.21041	1.83964	7.91517	6.65404	13.051	3.19299	15.9821		0		10.5547	6.15547	3.27726
					11.764	3.83245	3.37511	3.04052	4.18889	6.34558			4.87686		6.85015	5.97767	6.72549	5.45615	10.0671	4.86633	10.6493	3.60036	8.8836	4.21142	4.50773	5.28531	7.11002
					11.3095		3.47085	0.0695042	4.55211		3.09894	7.46265	5.35153	1.58304	3.67215		6.42319		5.31305	4.77246		12.6553	1.75746	9.02012	2.12167			5.58981
						4.25132	5.83684	6.60181		5.21387	5.69058	11.4103	5.18744	1.08195	4.18394	6.47922	12.8032	6.6073	13.5527		17.505	2.40309	3.99585	7.31943	11.4782		6.11763	4.65814
					4.17549	5.49144	2.77319	4.57747	3.46264	8.64205	3.35064	3.98047	9.73252	2.5842	8.03403	2.06376	5.76835	10.4548	21.2027	4.65908	13.2467		4.6173	5.39098	1.04139		3.18281	4.67225
					6.33639	5.65256	5.04217	0.80416	4.31228		0.561404	2.85799	3.3553	5.50833	4.09872	4.70707		10.1265		6.97194	11.2574	12.5038	4.0987	9.21221		15.2064	7.31557	10.0897
					6.18424		7.61865		4.54654	1.42439		2.02861	4.64414	4.10301		4.51961	5.94237		3.74787	5.33939	18.022		7.11916	6.69486	4.92179	13.5253	7.12646	4.34952
					1.79775	2.82671		6.45104	5.51773	3.08427	2.94997	4.90826	8.10911	1.02504	1.61177	5.1078	4.37952	9.12349	7.58227	5.89759		3.58547	3.36556	6.48597	6.73826	10.3239	14.6852	4.8182
					3.88179	7.19861	0.541528	4.17984	3.6567		2.86291	1.56028	5.33041		2.70973		6.0052	11.0325	6.29238	11.5849	16.9582	3.09215	1.8667	0.767077	3.38738	11.9403	3.89648	7.67317
					4.04381	4.94903		5.08478		4.07244	2.86628	5.42886			0	2.46435	8.49383	6.53951	5.90962	14.025	16.9327		4.81783		6.88091	12.0398	5.51836
					3.08702		9.60177	6.42104	4.02746	1.33677	5.05051	3.1801	2.47601	4.93893	3.61738	5.63932	12.5546	5.87141				8.24657		10.0518		19.9019		9.24648
					5.24279	3.15363	8.40571	4.16124	1.15976	1.39426	3.50647	4.07499	3.96428	2.63829	3.50374	0.570532	9.96715	6.06664	9.50458	6.75568	2.86287	12.8459	10.5577	7.84292	5.75748	18.2964	4.16553	9.95177
						4.2996	16.9514	6.57065		1.94994	4.37638	4.52928	3.38932	2.25061		3.83591		9.44102	2.68431	12.2995	13.634	8.20527	7.1061	10.5485	6.84296	20.6351	6.31678	9.51492
						1.84524		4.59308	3.32675	1.15557		1.38065	6.76872			1.17363	4.87982	12.1118	18.2732	11.4832	9.06682	14.0583	17.0561	8.55749	13.3313		2.16439	12.4198
							6.81246	3.52961	0.859328	4.79109	6.9137		5.19977	3.44116	6.5814	3.32494	0.967937		11.8966	13.4421	7.32187	15.5377	5.65215	5.87056	5.04673	11.9791	7.4851	15.1861
						3.69274	5.93881	4.61104			4.54525	4.08669	2.69596	10.4592	4.61945	1.58637	4.23531	11.6742	14.7693	8.05773	6.24522	12.5447	2.86018	6.66542	10.155	15.2571	6.9628	9.19815
						4.47409		5.14806	8.27291		4.82331	4.2743	1.07566	5.07345	1.3153	8.06029	12.3783			10.6082	9.00236		11.2622	8.50599	14.7204	12.5386	3.35782	15.6817
						3.64039	14.6128	0		12.5048	4.60293	3.98448	1.78461			5.88814	7.37014	7.45865	6.60465		12.5511		13.911	6.74318	25.7113	11.2446	13.0966
						2.25331	12.9403		7.91167		3.2972	1.75543		7.45061	5.25496			4.65055	8.45021	12.6192	14.0121	10.261	9.5145		19.0245	12.7727		2.36338
							10.4509	3.14809	8.62629	3.20141		4.17693	6.05165	7.7915	4.80314	0.634467	8.22216	11.7878	7.44682	7.18236		6.37346	9.66871	2.10685			5.87773	4.56158
						5.62899	12.5437	4.08433	6.6655	5.82891	2.2932	5.73449	7.38199	7.58507	6.4752	4.13114	7.81172	15.6795	4.98815	7.76458	4.57433	9.2619		2.49913	4.78819	13.4099	4.90227	5.28062
						2.13199	13.1341			6.77789	1.14577	4.28421	5.93546	4.50404	2.68254	2.53245	8.81348		1.33658		4.00241	9.61118	15.488	6.57671	3.33385	13.2349	8.10566	4.71349
						6.21474	17.5686	3.61395	6.34679	3.36333	5.68349		5.80333	7.02228	1.32275	4.04518	2.56004		11.7415	12.713	10.8599	5.13339	14.2894	2.67262	2.26846	6.7387	9.15895	5.26513
									3.30313	4.06434	3.45519	2.42813	2.47223	4.60759	3.47884		13.4806	0.978452	12.2725	13.4699	12.1757		17.3299	7.1388	3.84264	14.7392	8.08004	6.63119
						2.4975	10.696	11.2525	11.2762		1.42693	1.95069		3.83363	10.5006			2.45821	11.4608	14.6273	2.9806	10.4107	9.83759	2.31533	3.02744	11.1762	0.84016
						5.18969	1.8413	8.31178	10.1293	1.90022	1.44123		0.526749	4.12777		5.2751	9.60141	3.01867			10.0668	7.46228	12.2978	2.37723			9.26277	5.4682
							6.35898	12.6826		4.14162	1.68624	4.24596	2.14887		2.43955	5.16781	6.37699	2.84209		14.2659		11.6069		3.04327	2.05309	12.9185		9.95835
							7.65271	14.9427	10.0536	2.62037	3.69968	6.6068	6.15826	6.0902	1.1435	4.09303		1.31611		9.71235	13.8976		7.92402	4.29495	9.55241	17.346	7.04937	14.4933
						3.89669	5.30988	12.5613			6.53517	9.29882	1.89224	6.39001	4.37749	4.17519	6.2512	2.21568	4.11023		15.3573		4.24472	3.65218	9.07972	13.3012	4.68132	10.9753
						2.07242	8.33253	10.0142	2.08659	7.24855		7.42082	1.49708	7.45236	7.06655	10.129	9.66961	2.93855	11.709	14.9557	7.65042		8.92491		11.3765	15.12	11.8621	14.2103
						0				3.25998	3.78809	7.44399	1.96827		3.11487	2.10218	16.3526	8.43162	7.99217	8.54403	13.0001	13.675	10.8544	5.8349	12.4928	19.2969	11.3606	15.6101
						2.0369	2.34722	3.85478	2.28391	7.6711	3.28072	7.70031	0	4.06802		4.57895		5.6908	7.51648	12.5901	16.1748	24.8571	9.30469	8.64472	17.3345	12.1896	15.0575	8.7441
						4.01059	2.64291	6.65677	0.50804		3.93227	10.9118	0	3.88466	3.43876	0.633789	10.0773		10.6298	15.8594	8.49356			8.09139	9.83425			14.1638
							6.97256	8.72786	3.4398	5.87376	7.24454		7.39963	3.47102	1.00683		17.0768	3.00196	3.3905	12.9808	22.0597	15.0461	4.86503	8.36147	7.29293	4.79914	6.18554
						6.13949	4.09892	7.05233	2.12908	2.43074		3.14807	6.19688	0.69893	3.16632	5.2815	16.9416	5.77297	13.2137	6.23464	16.8018	16.3914	5.94041			0.353787	1.88074	9.23145
						5.60751	0.785932	4.48179	2.96434	4.78015	1.41511	3.6343	0	5.86725	0.753743	5.60151	8.84518	4.30328	17.0798	16.1288	21.6421	19.1708	2.98027	7.30343	6.76638	10.1836	6.23462	5.4328
									3.70178	4.01835	8.56217	0.343293		4.69509	2.5289	4.20164		2.93175				14.7281	7.22799	6.31944	4.9529	12.9401	3.7679	10.1813
						6.75366		3.29036	3.27958		3.90838	0	4.49831	4.93772	0	4.47359	14.3284	5.16634	10.4703	4.81707	4.63528		6.9289		12.1832	6.27306	13.4321	12.3913
						5.6457	2.62492	6.72377		1.8652	7.04695	2.45318	4.39006		1.85766	4.49735	11.6046	7.53367	9.99176	7.71123	4.63802	13.3273	4.72063	4.07416	8.07251	11.7991		10.488
						5.83555	1.88477	6.6815		6.47751	5.81371	5.45771	5.48623	6.31682		7.20986	7.43827		13.2711	5.04498	13.4886		7.91826	0.753387	9.05961	13.2958	10.0479	17.5095
						4.81589	3.02474	7.42102	6.7116	3.40357	8.18898	1.01418	3.71291	3.84225	6.1487	4.41467	9.73877		9.67002	12.1129	8.32371	11.5942		7.08328	11.7223		13.7661	9.85187
							2.06832	2.99116	7.28775	2.84775		0	3.0523	9.25728	5.29261	8.37014	13.549			9.46934	16.5982	10.206	12.453	3.51098	13.321	12.2387	11.3638	8.78097
						5.17565	3.23273	6.66615			2.81238	3.27852	0	5.48511	6.76517	6.03626		9.51524	13.2798		10.627	17.4633	7.31957		11.5484	24.9718	15.4923
						2.37453			2.40709		5.43835	5.97601	5.51249	6.41737	6.76671		11.2731	11.5045	7.48135	13.3984	6.91391		9.41392	6.48116			18.5162	5.41596
							3.47205	4.35403	2.16307	3.08165	2.24551		8.26408		3.51022	3.58438	11.1023	2.38424	15.1347	6.50024	8.86654	11.7912		5.50295	11.517	4.56395		10.8322
						3.15463	4.2706	3.70708	8.95477	3.10179	10.0347	1.74945	4.5337	4.25894	3.72382	2.13399	16.2484	5.60504	7.34227	2.84272	11.8539	10.2554	4.18836	4.8799	10.7798	6.4796	5.79128	15.9872
						1.43893	4.90497	2.89686	2.97066			1.82986	4.51254	4.24676	6.4767	3.8879	12.3368	5.56011	12.5458	13.3901		11.9182	3.80022	10.2455	4.95107	13.4815	7.34532	9.09349
						5.46463	2.27972	3.25441	5.08767	7.58808	5.16968	1.68607	4.38329	2.1755		4.3303	17.9909	6.64733	12.2323	8.80088		11.4118	3.58659	11.1776	6.57856	8.28101	5.97326	18.5099
							2.25474		4.33117	10.2805	4.18113	0.935202	9.44437	1.96734	9.01982		11.7873	11.3617	21.8367	12.3295		13.5448	5.20867	8.45227	21.6444	5.60842	13.5838
						0		6.43281		11.1981	7.29822	6.40562		3.81899	2.03526	5.43452				10.4753	2.43815		4.53581	10.8646	11.7318	8.69191	7.41146	9.40662
							4.06391	4.21403	3.83488				6.91956	4.76008	9.62185	4.58541	9.0085	7.0999	10.5564	10.7157	18.6721	8.63557	8.48639	8.97424	21.6699	12.571	9.25324	4.32099
						5.80441	2.41033	3.43515	0.862078	2.46841			1.10345	0.0545766	7.62782	5.79226	8.40659	11.2145		16.7175	10.4777		6.76862		9.00859	16.1688	8.65364	14.2284
						3.11269	2.51521	2.09794	7.6429	3.41576		2.29713	1.82617		0.731032	8.67534	15.6519	11.9555	8.54755			10.1191	8.90255	4.06692	15.1326	15.725	8.16359	15.0794
						1.78409	2.30926			6.04117		6.09136	6.94549	5.07364	7.957	7.66472	8.10477	4.14183	5.55853	4.20636		17.3664	6.35914	10.2201	10.202	11.6148	11.0668	16.1995
							3.91471		6.42171	6.24439		6.24262	5.87853	0.809342			13.2118		5.5341	9.47332	10.3641	11.7092		3.82393		11.0795	5.28176	14.4039
						0.918823	8.16837	3.29559	5.10761			2.17865	11.1788	1.93372		1.73874	13.181	5.16607	7.74566	6.83124	9.57758		2.8181	5.53328	6.54487		15.1953
						8.11855		2.12269	5.00529	1.88107			3.91124	1.38133	3.37007	2.54109	2.89208	3.21517		12.6725	13.0008	7.45962	6.43399	14.5521	1.86558	4.20149	8.03603	3.71698
						7.8559	2.18211		5.46861	3.72936		5.77708	3.44531	1.95977	1.7464	6.81141		6.43584	6.04168	12.6466	3.68563	9.97246	11.128	10.9772	12.8462	4.90172		7.61687
						2.12	1.91032	2.77287	3.47851	1.55736		4.14745		2.31218	0.764477	3.94872		11.4429	4.00836	9.04615		9.3311	10.1963		8.66558	5.54259	5.74342	11.3054
						6.02898	5.16228	4.49582		2.80833		1.02348	3.10481	0	0	4.0822		10.6874			6.75541		10.3421	0		5.9931	6.47358	12.8155
						7.83254		4.40621	1.31036	2.54949		7.11165	8.46734		3.35396		2.1245		4.69881		8.1244	10.7708	12.8343	0	4.57651	7.18238	6.48721
						8.85118	5.79848	6.89108	1.45628			9.44796	5.35663	5.57418	3.15719	8.34267	7.19136	11.1834	9.07675		9.08847	9.94441		5.78791	7.93124	3.71823	6.10992	5.94619
							3.55517		0.0339206	5.23396		5.06518	2.02419	2.71454	0	7.64014	3.35755	10.3964		9.52707	6.9911	14.0639	7.41228		7.40254		13.0856
						4.38574		1.73722	2.38265	1.68378		6.22806	4.23353	3.19867	2.98035	7.01837	7.20504	6.52056	1.60834	21.7987			17.2652	3.93184	13.875	21.5748	10.5569	8.17029
						5.86881	1.6758	6.99164		1.6568				6.77982	2.89599		5.26024	11.0481	2.25879		8.29638	14.2291		6.36004		11.7715
						5.12747	3.55875	5.51835	1.55063	3.00476		2.9591	6.69335	6.82249	1.0763			11.3049	2.32617	9.8035	4.21388	13.5907	8.26666	0.530759	3.25314	18.8886
							1.75604	8.8592	1.85396	4.16486			4.18532				10.8994			9.64909	11.2289	11.9288	1.51089	5.64522	9.96729	19.0461
							4.29491		2.47458	0		7.2	6.34764	1.91531	3.42936		2.49755	4.63649	14.1145	11.7189	12.7545	12.9626	5.07262	3.22139	6.24526		12.3654	9.08707
						3.65443		4.82935	4.1226	5.46983		5.69318	8.69622	3.63612	5.7137		5.83	5.57278		13.4491		13.6474	8.3965				16.8125	8.07681
						5.43728	7.65199	5.97192				3.82069	9.47206	3.07491	3.61465		9.02326	2.25487	13.9518				6.35877	4.35953				10.689
						3.62147	8.07265	7.01362	6.58276			5.94201	5.30054	3.28443	1.54321		0.842839	6.2257	5.26052	14.5676	6.41334	5.11587	8.42532			9.26662	12.0952	6.26247
						4.44008		0.6692	4.90548			2.32617			1.30421			3.57767	4.47671	15.0762	6.16672	5.76331	1.79503		5.47783	10.0287		7.82932
							9.54579	1.71994	7.10965			7.03597		1.43655	3.87632		4.06219		17.9342	22.9992		7.15753			8.46315	15.3302	5.18854	9.12929
						3.76615	8.08816		1.44587			3.91125	7.3007	4.14948			8.29317				7.03777	7.99663	5.96984	6.10361	14.8315	8.73775		11.1185
						5.79334	7.297	4.04685	4.03946			5.38459	5.5395	0	9.27286		8.66837		2.67982	17.8626	7.46126	19.5205	7.64919	6.77345	4.40489	17.1844	4.7411	7.50357
						4.13112						8.86739	6.6606	3.02011	10.4767		4.2911			11.6207	11.4318		8.45036	5.91919	4.24919		6.76334	10.1254
						1.44759	3.45885	2.97999	1.20009				4.46186	2.65298	9.21205					21.7617	11.2182	18.2153	9.4847	5.29761		6.78566	4.8125
						3.69281	0.694162		4.64353			2.0058	4.08081				4.38105			23.0861	11.4539	18.2348	13.0964	9.82262	7.24581	11.5663	3.41831	7.79394
						5.38787	4.18645	2.77375	6.52003			1.65805	7.25579	6.70981	3.19321		6.64223			22.6869		16.9261	3.7863	5.66223	20.2574	20.051	6.50724	10.8751
						4.17951		5.76933	12.9651			6.74184		13.3969	1.48596		5.73477			18.8372	13.6939		16.5874	9.39173	13.4046	12.182	8.16008
							5.60329	1.71447				2.55195	0	6.59223	3.16943		8.29779				14.1617			6.14773	19.4103	10.7802	11.8392	12.5283
							2.85669	9.4086	6.34977			5.143	3.34699	3.7331	3.01402					16.3501	16.3894		12.4927		14.3768	7.74118	6.4376	4.20565
							6.91789		5.16745				5.76725	7.63278	4.35908		1.6219			17.2324	17.0587		2.05286	5.19994	10.0301	12.1355	6.22992	2.98686
							3.40798	3.40842	1.87987			0.845487		6.58924	1.47522		4.71333			19.759	12.23		2.37698	7.90169			5.80382	9.60055
							3.00688	1.44241	6.67543			4.5182	5.52504	0.646609			4.54562			16.927			8.36343	6.40038	5.22029	16.73
							1.50984	4.64264	7.89804				3.95307	10.2263	4.2607						7.90493		9.10096	4.78056	2.33281	19.8271	6.68676	7.90359
								2.89195				4.19038	6.16911	7.18517	2.448		7.04097			17.5222	12.2739			4.51721	3.00949	15.4349	3.81999	18.4029
							0.967001	4.97225	7.25821			1.96019	3.42416		7.6964		6.25414			13.6639	12.5489			4.18225	1.69048		6.85607	29.6477
							0.344486					2.45725	4.22967	5.47824	0		4.62246			14.92	11.5608			6.98164	3.87506	14.0492	9.45155
							2.61708		0.722251			3.88871	3.28554	1.12302	6.04288		4.32057			17.8935	11.7263		9.54967	6.03729	4.19467		11.3318	10.7522
							2.60114	9.23536	6.0068			3.19429	5.42833	1.55202	6.66538		6.58198				16.4174		7.37646		7.50508		10.4205	9.94089
							1.12281	4.6153	5.6765			1.18785	2.76817	1.91653	1.89712		2.33346			19.6215			4.65588	8.24455	6.55115		9.32923	16.7925
							0.585797	4.05997	6.90354			2.36766	7.47504		3.66908		6.56726			5.87772	14.7682		8.22339	4.93405			12.3442	8.19844
							1.40231	5.52497					3.481	1.39933			0.903999			13.3808	15.4613		10.3691	1.305	1.31298
							2.70367		3.41137			4.60574		5.80306						17.7888	16.0493		3.30157	6.21301	5.87132		7.74631	8.09691
								3.8071	9.05333			6.84234	1.27775	3.88674	4.0158		3.25183			13.5232			3.21579	4.70063	3.11099		6.53104	9.03096
								2.68161	5.0598			6.09301	5.55482	1.2629	10.0197		2.59685			28.7983	9.63627		7.54774	1.97443	6.992
								2.53683				5.84077	0.391473		6.36862		2.70116			22.1935	4.93597		3.92744	5.13495	7.66307		9.33582	13.3458
								1.16377	0			1.55264	4.46678		5.54097		2.09932				4.58814		1.39156	6.25176	10.2865		7.76844
									1.37846			4.74457	2.16067	6.05605			7.65051			10.7545			6.66228	6.55875	17.4384		12.4299	8.91177
								2.77987	3.55357			4.17404			5.48617					5.02702	7.61439		7.54338	4.732	10.6506		18.3163	12.8066
								3.77126	1.82833				0.133087		1.31492		2.64221			10.0084	7.12203				8.54049			18.9379
								5.03289	0			4.59201	1.12973	1.69208	7.14476		6.3319				10.9755		2.42189	5.60457	8.02013		6.4854	11.9228
									2.69096			4.12995	1.92076	2.80407	6.59731		5.64589			13.2339	8.96218		2.98861	2.65466	12.3093		3.47866
								3.55369				4.46104	0.971662	3.19923	5.49627		3.07962			5.83776	13.7652		2.00879	6.33456	9.75007		3.53987	7.41543
								2.80053				2.97303	1.79835	1.99844			6.46002			15.5172			7.77724	8.25038	9.66908		3.27994	8.53625
								4.59751				2.1242			6.14763		6.00255			15.7446			8.22473				3.90087	6.91374
													6.45914	9.10525	3.40452								8.42093	6.30879	7.86971		8.37126	5.93729
												6.40458	3.37262	2.39346	8.8963		2.23157						2.20422	9.12444	7.94181			6.63532
												3.41371	3.86642		8.70405		4.53639							3.62263	14.0014		11.1357
												4.97052	4.33441	2.50209	5.59238		7.45426						3.9901	8.59548	4.69881		12.7758
												8.53121	7.12083	3.02567	3.0479		7.4377						5.55133	4.28474	7.96058		8.3223
												2.76531	5.05283	5.31152	7.07288		2.91802						5.81372	14.7949	12.4621
												4.9709	8.92769	0.365178									5.78854	7.01728	8.3054
												3.3154	2.53158	5.77597	4.42699		7.04701						9.76081
												2.29522	0.934807		1.6058		7.08883						7.72919	0.93214	7.11707
													3.68528	0	4.10105		12.6407						4.06498	1.39646	11.9456
												3.83742	7.89563	10.7512	3.6952		8.4778						8.47856	2.12969	16.7842
												3.77165			4.5329		7.11997						4.52928	7.08637
												5.20079	9.60888				5.03328							3.52734	4.35599
												5.6806	2.9419		3.24914		9.14541						4.71624	0.752977	7.53776
												5.64815	4.65065		0.693312								7.169		4.43244
													3.71506		3.59335		3.53233						2.76019	1.73213
												5.28447	8.64784		5.50129		8.18348						6.53848	6.28792	5.59653
												3.17454	0.480026				4.63483						7.13875	2.06178
												2.81127	4.62465		1.57674		9.0757						5.72713	2.00314	10.9075
												1.33317	3.99638		2.01093		11.6763						13.1198	8.31416	17.0993
													5.31983		2.23612		14.0955						2.22351	6.9724	13.7134
																							10.7264	6.71704	15.8441
													2.6175		4.85311		4.29752							6.77388	21.3234
													1.92114		3.59289		5.16984						0.656007	5.44782
													1.19958		5.91695		10.7812						6.15271	3.09515	16.9874
													1.17578		5.81506		6.56903						2.47739		9.54602
													1.13664		4.06418								14.0891	4.68228	5.68889
													1.97485				5.32505						5.22773	1.33006	5.13842
													3.11313		13.2892		5.0749							0
															9.95396		4.72943						8.29899	2.06439	13.0203
													4.53793		9.5183		11.5765						3.45378	3.50524	12.1293
													4.78966		10.0171		7.88588						6.55503	5.6555	15.1738
													4.86701										3.79148	1.5906
															2.01519								5.24352	2.77396
													5.61801		3.84054								2.334
													7.88157		1.90851								5.77444	14.4168
													9.08666		7.94566								1.60784	8.84988
													9.0566		5.92299								3.25154	19.1797
															5.35146								4.09483
													1.10803		7.12854								6.83588
													4.71473										6.6962
													4.83749		4.81558
													6.39595		4.03408								4.6635
													5.08987		5.14427								2.16504
													5.75676		4.5289								4.5727
													1.43662		5.31082								10.3545
																							7.91473
													7.13367		13.4771								7.70101
													2.44603		9.63443
													1.06112		4.58215								3.00405
													4.90109		11.4906								5.80206
													4.07864		2.54229								5.06444
															12.088								5.9657
															11.5562								5.71325
																							12.7682
															3.58522
															7.11365								5.31683
															9.27133								6.87434
															7.22949								7.82441
																							2.93448
				mean	5.02824	4.09464	4.98229	4.73201	4.41184	5.09876	5.15478	4.19921	4.59131	4.06466	4.75067	4.93898	7.95434	7.18186	10.2857	11.8199	10.2121	10.6514	6.56722	6.79823	9.09167	11.8398	7.78271	8.47802
				SEM	0.263069	0.220974	0.259789	0.221922	0.202269	0.252069	0.242349	0.179266	0.176322	0.187085	0.194096	0.238296	0.312796	0.286981	0.449885	0.420852	0.35001	0.395475	0.241724	0.286554	0.339235	0.461089	0.288147	0.344677
				n	84	133	152	161	155	129	122	184	217	179	221	128	188	132	128	162	156	133	225	204	195	154	171	167
