# Supplementary material for: β2-subunit alternative splicing stabilizes Cav2.3 Ca2+ channel activity during continuous midbrain dopamine neuron-like activity
Source: eLife. 2022 Jul 6;11:e67464. doi: 10.7554/eLife.67464 (PMC9307272; doi:10.7554/eLife.67464)
Supplement: Figure 2—source data 1. [file elife-67464-fig2-data1.xlsx]

## Sheet: Table 1
Figure 2	Substantia nigra (SN)										Ventral tegmental area (VTA)
	SN β1-4					SN β2 splice variants (β2a-e)					VTA β1-4					VTA β2 splice variants (β2a-e)
β subunit transcript expression	β1	β2	β3	β4		β2a	β2b	β2c-d	β2e		β1	β2	β3	β4		β2a	β2b	β2c-d	β2e
mouse SN + VTA tissue punches	265	1939	204	4701		160	15	229	135		447	1967	450	3519		175	25	403	195
(RT-qPCR)	356	1978	288	4455		196	22	330	162		608	2062	646	4389		268	35	373	231
	438	1800	382	4232		216	21	248	191		406	1820	364	3777		242	25	305	174
n-number	3	3	3	3		3	3	3	3		3	3	3	3		3	3	3	3
mean	353	1905.67	291.333	4462.67		190.667	19.3333	269	162.667		487	1949.67	486.667	3895		228.333	28.3333	360.333	200
standard deviation	86.539	93.5646	89.0468	234.594		28.3784	3.78594	53.6749	28.006		106.775	121.928	144.531	446.842		47.9826	5.7735	50.2129	28.8271
standard error	49.9633	54.0195	51.4112	135.443		16.3843	2.18581	30.9892	16.1692		61.6468	70.3949	83.4453	257.984		27.7028	3.33333	28.9904	16.6433
preparations (N):	3	3	3	3		3	3	3	3		3	3	3	3		3	3	3	3
