# Supplementary material for: β2-subunit alternative splicing stabilizes Cav2.3 Ca2+ channel activity during continuous midbrain dopamine neuron-like activity
Source: eLife. 2022 Jul 6;11:e67464. doi: 10.7554/eLife.67464 (PMC9307272; doi:10.7554/eLife.67464)
Supplement: Figure 3—source data 1. [file elife-67464-fig3-data1.xlsx]

## Sheet: Table 1
Figure 3	5 sec						30 sec						1 min						2 min						5 min
	Cav2.3+β2a	Cav2.3+β2e	Cav2.3+β3	Cav2.3+β4	Cav1.3L+β3		Cav2.3+β2a	Cav2.3+β2e	Cav2.3+β3	Cav2.3+β4	Cav1.3L+β3		Cav2.3+β2a	Cav2.3+β2e	Cav2.3+β3	Cav2.3+β4	Cav1.3L+β3		Cav2.3+β2a	Cav2.3+β2e	Cav2.3+β3	Cav2.3+β4	Cav1.3L+β3		Cav2.3+β2a	Cav2.3+β2e
Activity-dependent inactivation of Cav2.3 ICa	91.52	95.1	26.23	42.89	80.1566		77.53	84.53	1.84	13.88	50.9446		70.08	75.63	2.91	7.41	35.7464		57.04	59.63	6.29	4.06	25.6461		37.58	33.06
during simulated SN DA pacemaking	94.61	94.51	42.08	62.1	76.6701		79.88	78.88	9.92	30.89	45.6562		71.19	65.49	6.98	18.45	26.9879		64.76	47.41	2.35	10.36	15.2027		51.44	29.37
different β subunits	84.51	81.54	30.13	64.6	85.1758		60.48	63.98	6.22	37.45	61.5289		52.16	58.23	2.51	23.79	42.9723		43.98	52.94	3.96	10.32	23.4506		37.83	40.8
Cav1.3L for comparison (Ortner et al., 2017)	91.15	99.58	33.97	64.42	80.4682		72.8	90.99	9.39	31.21	54.0602		60.86	82.6	4.77	19.73	35.3343		45.96	69.97	2.56	9.34	20.412		24.11	36.99
(tsA-201 cells)	94.99	94.9	35.58	64.71	83.6284		84.01	78.39	6.15	26.32	58.6187		75.43	61.81	2.94	13.19	45.5744		63.85	39.51	7.93	8.34	34.9137		41.92	19.76
	91.04	83.73	11.21	65.41	78.2991		70.95	49.81	7.06	32.74	57.7367		57.11	34.69	4.55	17.01	44.7413		38.56	27.1	2.07	3.4	28.4574		17.24	20.55
	90.22	95.56	22.41	50.01	86.4262		77.52	86.51	9.02	14.56	69.2562		67.01	77.43	7.5	7.33	55.7928		54.24	53.96	6.37	3.03	37.7352		40.13	35.06
	88.57	94.42	25.03	59.03	84.491		71.94	81.61	3.75	26.27	65.2573		63.52	68.72	0.9	15.07	52.8148		46.66	52.4	3.45	6.42	40.1802		21.36	33.13
	83.68	91.64	28.86		86.6853		63.74	72.94	2.06		64.001		54.82	58.08	2.84		45.2925		42.84	40.66	4.86		27.5647		14.83	37.62
	91.34		43.95		89.6701		75.76		9.56		69.6575		64.29		3.94		55.5475		48.25				39.7732		27.7
	94.09		26.23		87.2291		84.59		6.65		72.8257		77.23		3.98		63.0498		67.81				49.7663		48.73
	94.43		34.25		83.7371		85.5		7.03		57.6055		78.27		5.38		42.5686		69.08				23.9842		51.2
					86.6228						65.5639						50.3525						36.3947
					89.0216						75.3189						61.2468						40.1867
					88.4324						73.0022						61.9612						46.5954
n-number	12	9	12	8	15		12	9	12	8	15		12	9	12	8	15		12	9	9	8	15		12	9
mean	90.8458	92.3311	29.9942	59.1462	84.4476		75.3917	76.4044	6.55417	26.665	62.7356		65.9975	64.7422	4.1	15.2475	47.9989		53.5858	49.2867	4.42667	6.90875	32.6842		34.5058	31.8156
standard deviation	3.72468	5.887	8.89639	8.31711	3.96156		7.90239	12.7067	2.78856	8.46836	8.65057		8.74517	14.2009	1.8902	5.79171	10.6032		10.6732	12.4772	2.06858	3.09879	10.011		13.0987	7.35883
standard error	1.07522	1.96233	2.56817	2.94054	1.02287		2.28122	4.23558	0.804989	2.99402	2.23357		2.52451	4.73365	0.545655	2.04768	2.73773		3.08108	4.15906	0.689527	1.09559	2.58482		3.78128	2.45294
transfections (N):	4	2	4	2	6		4	2	4	2	6		4	2	4	2	6		4	2	4	2	6		4	2
Cav1.3L+β3: data taken and reanalyzed from Ortner et al., 2017, J Neurosci
