# Supplementary material for: β2-subunit alternative splicing stabilizes Cav2.3 Ca2+ channel activity during continuous midbrain dopamine neuron-like activity
Source: eLife. 2022 Jul 6;11:e67464. doi: 10.7554/eLife.67464 (PMC9307272; doi:10.7554/eLife.67464)
Supplement: Figure 5—source data 1. [file elife-67464-fig5-data1.xlsx]

## Sheet: Table 1
Figure 5	whole burst				post-burst APs										Figure 5	r100 [%]			r1500 [%]			r4000 [%]			r10000 [%]
					1st AP				2nd AP						Table 2	β2a	β4		β2a	β4		β2a	β4		β2a	β4
Cav2.3 ICa during/after a simulated	β2a	β2e	β4		β2a	β2e	β4		β2a	β2e	β4				Cav2.3 ICa recovery from inactivation	16.49	8.14		33.88	28.72		50.77	41.78		77.24	68.69
SN DA neuron burst	5.81	4.64	4.26		1.1	1.24	1.95		1.08	1.11	1.59				with β2a or β4	13.85	8.44		35.19	28.28		48.24	44.3		77.09	66.76
(tsA-201 cells)	4.9	4.73	8		1.12	1.1	2.04		1.06	1	1.71				(tsA-201 cells)	9.56	6.91		29.16	25.26		53.86	47.75		89.31	75.32
	4.95	5.25	4.16		1.12	1.14	1.71		1.04	1.06	1.55					12.28	12.81		66.15	34		82.34	48.79		72.96	69.37
	5.04	4.09	4.88		1.1	1.13	1.63		1.04	0.78	1.37					11.45	15.08		30.34	38.25		48.09	48.78		47.17	66.21
	5.48	3.31			1.03	1.17			1.05	0.94						8.59	10.1		19.88	36.38		27.48	46.92		64.35	66.21
	5.69	5.58			1.11	1.17			1.06	1.18						7.14	23.01		24.11	43.39		35.63	58.08		51.74	78.36
	5.33	4.54			1.12	1.22			1.03	1.04						11.82	15.22		27.42	47.49		33.21	69.18		99.69	81.94
	4.09	4.53			1.67	1.03			1.58	0.97						17.81	14.85		74.34	38.25		89.27	55.72		63.05	74.98
	4.99	3.73			1.14	1.24			1.1	0.95						5.78			21.5			34.51			77.79
	5.4				1.42				1.06							13.3			31.34			48.95			86.38
	6.75				1.15				1.09							38.81			66.17			73.81			88.63
	6.38				1.06				1.04							37.31			70.33			79.15			57.69
	5.22				1.11				1.03							14.24			28.29			37.93			75.67
	7.81				1.1				1.11							10.39			24.88			48.99			85.3
	8.01				1.51				1.42							28.42			56.24			69.59			73.62
																9.43			28.97			45.72
n-number	15	9	4		15	9	4		15	9	4
mean	5.72333	4.48889	5.325		1.19067	1.16	1.8325		1.11933	1.00333	1.555
standard deviation	1.08881	0.705327	1.81155		0.185952	0.069282	0.193972		0.159395	0.114564	0.140831				n-number	17	9		17	9		17	9		16	9
standard error	0.28113	0.235109	0.905773		0.0480126	0.023094	0.0969858		0.0411555	0.0381881	0.0704154				mean	15.6865	12.7289		39.3053	35.5578		53.3847	51.2556		74.23	71.9822
															standard deviation	9.84728	5.02697		18.8994	7.30655		18.7375	8.43541		14.4253	5.82593
															standard error	2.38832	1.67566		4.58377	2.43552		4.54452	2.8118		3.60633	1.94198
transfections (N):	4	2	2		4	2	2		4	2	2
															transfections (N):	3	3		3	3		3	3		3	3
