# Supplementary material for: β2-subunit alternative splicing stabilizes Cav2.3 Ca2+ channel activity during continuous midbrain dopamine neuron-like activity
Source: eLife. 2022 Jul 6;11:e67464. doi: 10.7554/eLife.67464 (PMC9307272; doi:10.7554/eLife.67464)
Supplement: Figure 6—figure supplement 1—source data 1. [file elife-67464-fig6-figsupp1-data1.xlsx]

## Sheet: Table 1
Figure 6-figure supplement 1	Panels C+D: SNX-482 (100 nM)					Panels G+H: Nifedipine (10 µM)
Supplementary file 7	Ctrl [pA]	SNX-482 [pA]	Remaining Percentage			Ctrl [pA]	Nifedipine [pA]	Remaining Percentage
HVA ICa in adult brain slices	983	856	87			854	737	86.3
(perforated patch)	1114	828	74.3			1305	1168	89.5
	1878	1420	75.6			850	803	94.5
	1096	1084	98.4			1166	1066	91.4
	1387	1364	98.9			1617	1499	92.8
	624	466	74.6			1642	1421	86.6
	1224	1135	91
	1482	1436	96.9
n-number	8	8	8			6	6	6
mean	1223.5	1073.62	87.0875			1239	1115.67	90.1833
standard deviation	371.755	341.506	10.8925			350.578	311.938	3.32711
standard error	131.435	120.741	3.85109			143.123	127.348	1.35829
preparations (N):	7	7	7			6	6	6
