# Supplementary material for: β2-subunit alternative splicing stabilizes Cav2.3 Ca2+ channel activity during continuous midbrain dopamine neuron-like activity
Source: eLife. 2022 Jul 6;11:e67464. doi: 10.7554/eLife.67464 (PMC9307272; doi:10.7554/eLife.67464)
Supplement: Figure 6—source data 1. [file elife-67464-fig6-data1.xlsx]

## Sheet: Table 1
Figure 6
Table 3		Figure 6A/Table 3		Control A vs. R-type (=current in TLNPQ-blockers)
																				N=8																						N=5
Voltage-dependence of				inactivation control A																			inactivation in TLNPQ																						activation control B
activation and inactivation			Experiment #	1	2	3	4	5	6	7	8	9	10	11	12	13	14	15	16	mean	SD		1	2	3	4	5	6	7	8	9	10	11	12	13	14	15	16	17	18	19	mean	SD		1	2	3	4	5
		mV -100		0.94497	0.9707	0.97281	1.05769	1.03575	1.03006	1.04393	1.00796	1.10114	0.97979	1.00685	0.91843	1	0.96237	1.07787	1.07627	1.01166	0.0520181		0.95389	1	1	0.983908	1	0.854468	0.942857	0.998031	0.637596	1.07895	1.09369	1.34914	1.02163	1.03769	1	1.00933	0.869325	1.17546	0.989322	0.999751	0.138449
(whole-cell patch-clamp recordings)		-90		0.93934	0.98276	0.96242	1.08081	0.98416	0.96561	0.94638	0.92502	0.97238	0.98433	1.00685	0.97509	0.96085	0.92929	0.98502	0.97297	0.97333	0.0361782		1	0.977202	0.941435	1	0.989541	0.93617	0.923077	0.950378	1.10345	1.07895	1.04814	1.07777	0.934589	1.01187	0.990099	0.970339	0.869325	1.41107	0.817084	1.0016	0.121717		0.000191	0.000312	0.000579	0.000259	0.000327
(identified SN DA neurons in mouse brain slices)		-80		0.9368	0.96754	0.90355	0.97367	0.96018	0.95699	0.86204	0.8102	0.88235	0.97304	0.94521	0.95374	0.8363	0.84848	0.88727	0.875	0.910772	0.05413		0.988473	0.925389	0.903367	0.980843	0.928399	0.934468	0.827473	0.945946	0.976528	0.958937	1.00275	0.970576	0.960774	0.939914	0.903257	0.949082	0.99156	1.16355	1.01176	0.961213	0.0650214		0.0002	0.000327	0.000606	0.008126	0.018487
		-70		0.85259	0.89019	0.85995	0.90692	0.91716	0.973	0.75036	0.54988	0.84328	0.8916	0.84828	0.90943	0.69395	0.72727	0.73381	0.7716	0.819954	0.107867		0.95389	0.831606	0.898243	0.957854	0.893805	0.955745	0.926374	0.811359	0.923886	0.813919	0.908108	0.922322	0.893258	0.876367	0.832039	0.925708	0.938707	0.903335	0.989172	0.902931	0.050748		0.016791	0.052745	0.032404	0.017612	0.023697
		-60		0.74155	0.77646	0.72729	0.69537	0.80807	0.89694	0.59701	0.24464	0.48748	0.70106	0.73868	0.80228	0.59245	0.6178	0.62069	0.6358	0.667723	0.151867		0.87781	0.708808	0.833821	0.792337	0.798069	1	1	0.563087	0.823529	0.632258	0.591164	0.809095	0.794683	0.670008	0.740887	0.790181	0.885317	0.702295	0.849606	0.782261	0.119702		0.045233	0.16671	0.123573	0.018515	0.072472
		-50		0.59116	0.61398	0.54179	0.42666	0.57479	0.80674	0.14881	0.04586	0.22575	0.49161	0.59028	0.648	0.41379	0.45082	0.43866	0.49383	0.468908	0.193427		0.691066	0.485492	0.663982	0.590805	0.600161	0.899574	0.942857	0.300714	0.674342	0.4	0.359703	0.542489	0.570687	0.39611	0.630542	0.394383	0.749036	0.485174	0.679822	0.581944	0.17484		0.072564	0.3541	0.341472	0.042809	0.206887
		-40		0.34256	0.32982	0.2703	0.16365	0.30029	0.37627	0.01082	0.00207	0.11259	0.23654	0.26871	0.238	0.1728	0.24737	0.25627	0.26358	0.224478	0.108099		0.41902	0.284456	0.417277	0.421456	0.395817	0.626383	0.678022	0.160356	0.295325	0.2113	0.119605	0.205117	0.207024	0.169273	0.351759	0.0625	0.53151	0.230878	0.404706	0.325883	0.168636		0.222264	0.730213	0.587995	0.082192	0.305772
		-30		0.00419	0.08562	0.05252	0.06969	0.09931	0.10633	0.01355	0.0044	0.07178	0.04628	0.08095	0.00117	0.07083	0.09619	0.1112	0.08889	0.0626812	0.0381721		0.075504	0.02228	0.133968	0.252874	0.122285	0.311489	0.294505	0.021879	0.060062	0.12553	0.053516	0.015045	0.136	0.044359	0.042105	0.021739	0.019297	0.017325	0.06925	0.0967901	0.094256		0.511105	1	0.884135	0.226579	0.52192
		-20		0.00459	0.01865	0.02016	0.0623	0.0605	0.0548	0.01704	0.00576	0.04794	0.11817	0.05634	0.00124	0.06549	0.05507	0.00253	0.07134	0.04137	0.0327774		0.001729	0.005181	0.012445	0.14636	0.006436	0.061277	0.054945	0.024709	0.021039	0.018681	0.04428	0.003559	0.070715	0.021182	0.006494	0.004511	0.011916	0.017325	0.01283	0.0287165	0.0351561		0.963243	0.987509	1	0.935484	0.968724
		-10		0.00524	0.02168	0.00965	0.05332	0.06312	0.0617	0.02114	0.00831	0.03226	0.14516	0.06236	0.00255	0.06	0.0871	0.00248	0.0035	0.0399731	0.039486		0.004035	-0.00207	0.005124	0.022222	0.006436	0.015319	0.003297	0.018395	0.024042	0.026076	0.009699	0.011945	0.031434	0.018106	0.006719	0.005106	0.006483	0.020627	0.010462	0.0128135	0.0091447		1	0.90066	0.952188	1	1
		Figure 6B/Table 3		Control B vs. SNX-sensitive current									N=6												N=6												N=6												N=6
				activation control B												inactivation control B												activation SNX-sensitive												inactivation SNX-sensitive
			Experiment #	1	2	3	4	5	6	7	8	9	mean	SD		1	2	3	4	5	6	7	8	9	mean	SD		1	2	3	4	5	6	7	8	9	mean	SD		1	2	3	4	5	6	7	8	9	mean
		mV -100														1	1	1	1	1	1	1	1	1	1	0														1.00422	0.692932	1.21306	1.04802	1.22763	0.960199	1.08568	0.897988	1	1.01442
		-90		3.3e-05	2.9e-05	1.7e-05	1.8e-05	3.2e-05	2.2e-05	1.6e-05	2.3e-05	1.6e-05	2.28889e-05	6.86375e-06		1	1	1	1	1	1	1	1	1	1	0		0	0	0	0	0	0	0	0	0	0	0		0.998114	0.777002	1.2111	1.10777	1.05228	1.16699	1.02565	1.0483	1	1.04302
		-80		3.5e-05	3.1e-05	1.8e-05	1.9e-05	3.3e-05	2.3e-05	1.7e-05	2.4e-05	1.6e-05	2.4e-05	7.29726e-06		0.9934	0.9341	1	1	0.8993	1	0.9619	0.9459	1	0.970511	0.0372138		0	0	0	0	0	0	0	0	0	0	0		1.07235	0.824327	1.11809	1.04814	1.01272	1.37862	1.05198	1.12244	1	1.06985
		-70		3.7e-05	0.009	1.9e-05	2e-05	0.01668	2.4e-05	1.7e-05	0.01249	0.02545	0.00708189	0.009431		0.8344	0.8222	0.9762	0.8882	0.7587	0.8673	0.8137	0.7894	0.9074	0.850833	0.0664412		0	0	0	0	0	0	0	0	0	0	0		1.01731	0.957418	1.21312	1.03333	1.07861	1.15485	0.91488	0.985738	1	1.03947
		-60		0.17869	0.22712	0.08572	0.0063	0.08693	0.04488	0.01345	0.14711	0.22138	0.112398	0.084856		0.7089	0.6313	0.8456	0.6938	0.5514	0.6657	0.612	0.6195	0.7173	0.671722	0.0841294		0	0.139961	0	0	0	0	0	0	0.00373101	0.0159658	0.0465146		1.14696	0.810465	0.892828	0.87148	0.670515	0.963717	0.610239	0.833032	0.981303	0.864504
		-50		0.26045	0.38034	0.26266	0.03443	0.20212	0.11655	0.04408	0.21225	0.3011	0.201553	0.116804		0.412	0.3674	0.6441	0.4635	0.3242	0.4538	0.3603	0.4138	0.4698	0.434322	0.093207		0.0172624	0.585208	0.231892	0	0.251433	0	0	0.104916	0.247366	0.159786	0.194349		0.604267	0.538835	0.545808	0.589931	0.368108	0.647586	0.379486	0.451145	0.747917	0.541454
		-40		0.35412	0.52232	0.38541	0.19591	0.44483	0.27476	0.13878	0.32016	0.41694	0.339248	0.121608		0.1858	0.1904	0.2465	0.1925	0.1781	0.2131	0.1298	0.2391	0.1431	0.190933	0.03892		0.197419	0.935092	0.421714	0.267619	0.942857	0.31091	0.074902	0.378287	0.46272	0.443502	0.304354		0.334179	0.410718	0.45126	0.297699	0.308448	0.308946	0.191271	0.283196	0.316572	0.322477
		-30		0.50638	0.64963	0.58193	0.70874	0.66743	0.51814	0.40133	0.45322	0.61599	0.566977	0.103731		0.0855	0.1228	0.0126	0.0103	0.0999	0.1011	0.0092	0.0998	0.0912	0.0702667	0.0458007		0.351906	1	0.363636	1	1	0.779945	0.219399	0.495215	0.703295	0.657044	0.309641		0.248217	0.334603	0.246558	0.190764	0.30321	0.166676	0.104899	0.292408	0.231234	0.235397
		-20		0.79045	0.83791	0.8452	0.96852	0.91343	0.83935	0.80655	0.71777	0.90454	0.84708	0.0743049		0.0641	0.0279	0.0153	0.0103	0.0737	0.07	0.01	0.021	0.041	0.0370333	0.0260717		0.608741	0.825603	0.51871	0.88172	0.836755	0.926642	0.565262	0.584745	0.933137	0.742368	0.169446		0.171824	0.271656	0.188465	0.20441	0.331115	0.181196	0.178177	0.273832	0.161766	0.218049
		-10		1	1	1	1	1	1	1	0.99561	1	0.999512	0.00146333		0.0627	0.0319	0.0163	0.0103	0.0599	0.0872	0.0118	0.006	0.0499	0.0373333	0.0287962		0.931034	0.749769	0.922759	0.988506	0.693835	1	0.98287	0.865898	1	0.903852	0.113073		0	0	0.202927	0	0	0	0	0	0.223543	0.0473856
		0		0.94641	0.93281	0.93442	0.91175	0.90826	0.89599	0.93886	1	0.88372	0.928024	0.0341766		0.0724	0.0328	0.0178	0.0103	0.0735	0.0971	0.014	0.0063	0.0407	0.0405444	0.0329179		1	0.662701	1	0.938272	0.73064	0.829413	1	1	0.889223	0.894472	0.128103		0	0	0.242332	0	0	0	0	0	0.281956	0.0582542
[truncated: 34 more columns]
