# Supplementary material for: β2-subunit alternative splicing stabilizes Cav2.3 Ca2+ channel activity during continuous midbrain dopamine neuron-like activity
Source: eLife. 2022 Jul 6;11:e67464. doi: 10.7554/eLife.67464 (PMC9307272; doi:10.7554/eLife.67464)
Supplement: Figure 7—figure supplement 1—source data 1. [file elife-67464-fig7-figsupp1-data1.xlsx]

## Sheet: Table 1
Figure 7-figure supplement 1	Frequency			ISI coeff variation			AHP peak
SNX-482 effects on pacemaking of	Ctrl [Hz]	SNX-482 [Hz]		Ctrl	SNX-482		Ctrl [mV]	SNX-482 [mV]
cultured mouse midbrain DA neurons	5.2	0.8		0.26967	0.77521		-47.87	-53.18
(100 nM SNX-482)	5.6	1.1		0.20453	0.71532		-42	-47
	5.58	0.2		0.16464	1.50761		-41.3793	-45.0058
	2.3	0.2		0.19466	0.78827		-46.8383	-47.0002
Ctrl = control	1.5	0.6		0.25101	0.29717		-38.7871	-41.3581
AHP = afterhyperpolarization	2.6	0.4		0.11947	0.59579		-45.6281	-49.1202
ISI = interspike interval	1.1	2.4		0.56112	0.58713		-48.3149	-49.8619
coeff variation = coefficient of variation	7	1		0.0639	0.97294		-40.8408	-48.6993
	0.9	0.25		0.49498	1.35773		-38.7844	-44.1386
	9	4.4		0.17764	0.24571		-42.0151	-44.5508
n-number	10	10		10	10		10	10
mean	4.078	1.135		0.250162	0.784288		-43.2458	-46.9915
standard deviation	2.78	1.32289		0.158648	0.407462		3.61753	3.39541
standard error	0.879113	0.418333		0.0501688	0.128851		1.14396	1.07372
cells (n):	10	10		10	10		10	10
preparations (N):	3	3		3	3		3	3
