# Supplementary material for: β2-subunit alternative splicing stabilizes Cav2.3 Ca2+ channel activity during continuous midbrain dopamine neuron-like activity
Source: eLife. 2022 Jul 6;11:e67464. doi: 10.7554/eLife.67464 (PMC9307272; doi:10.7554/eLife.67464)
Supplement: Figure 7—source data 1. [file elife-67464-fig7-data1.xlsx]

## Sheet: Table 1
Figure 7	Ctrl with isradipine [pA]	SNX-482 [pA]	Inhibition [%]			Fig 7 E																Fig 7 F
	76.79	20.43	73.395		CTRL with isradipine [mV]	mV -60	0.010917	0.00885594	0	0.0117943	0	0	0.00320061	0.00367652	0.0214286	0.00204786	0.000282486	0.00495873	0.000857143	0.00149277	CTRL with isradipine [mV]	-80	1	1	1	1	1	1	1	1	1	1	1	1	1	1	1
SNX-482 inhibition of HVA ICa	375.3	242.9	35.2784			-50	0.055313	0.0103687	0	0.0140933	0.0241549	0.0303036	0.0251761	0.0244959	0.0602656	0.0199954	0.0141243	0.0119456	0.00782684	0.00559		-70	0.946996	0.661017	0.964356	0.835749	0.671429	0.944572	0.996088	0.969632	0.894211	0.926061	0.910417	0.87576	0.988792	1.00517	0.95082
cultured mouse midbrain DA neurons	566.8	421.1	25.7057			-40	0.0608443	0.0452375	0.00148786	0.0727512	0.121328	0.0680567	0	0.0313737	0	0.0458583	0.0310734	0.036357	0.0438095	0.00784359		-60	0.766784	0.47081	0.627723	0.705314	0.38	0.885479	0.91518	0.943832	0.901432	0.78847	0.634167	0.785491	0.876982	0.958621	0.644262
(100 nM SNX-482)	578.8	548	5.32135			-30	0.20706	0.0720808	0.00514487	0.182919	0.170191	0.0837247	0.0321593	0.0480963	0.0878388	0.0473539	0.059322	0.049904	0.203175	0.0170373		-50	0.791519	0.370998	0.269307	0.328502	0.154286	0.769812	0.517371	0.860253	0.800698	0.391556		0.614509	0.72936	0.818966	0.409836
(3 µM isradipine)	257	103.7	59.6498			-20	0.438428	0.0871294	0.0233751	0.208612	0.201106	0.186802	0.122557	0.166494	0.358333	0.0679245	0.146893	0.290211	0.814286	0.125398		-40	0.611307	0.205273	0.0574257	0.219807	0.0514286	0.38273	0.37856	0.703037	0.622698		0.200958	0.443527	0.458721	0.537931	0.206885
	593.2	500.2	15.6777			-10	0.840611	0.692732	0.310728	0.324402	0.536447	0.454251	0.517611	0.806579	0.869689	0.218201	0.658192	0.751686	1.19728	0.466695		-30	0.540636	0.101695	0.0277228	0.0700483		0.139441	0.154194	0.292126	0.388254			0.187142	0.199672	0.32931	0.0442623
	136.3	64.28	52.8393			0		0.827211		1.00933	1.01967	0.873279		0.903137		1.11344	0.855932		0.954286	1.13907		-20	0.349823	0.0357815				0.0137426	0.0312989	0.0483741	0.0917559					0.0431034	0
	666.3	210	68.4827			10	0.997254	1.39935	0.858736	1.10435	1.05824	0.978017	1.09718	0.879518	1.05394	0.771577		0.925055		1.11448		-10	0	0					0.028169	0	0
	500.2	348.6	30.3079			20	1	1	1	1	1	1	1	1	1	1	1	1	1	1
	427.2	299.6	29.8689
	269.8	162.1	39.9185
	406	293	27.8325		SNX [mV]	-60	0.0133291	0.0141323	0.0067548	0.00580151	0.00575	0.0258524	-0.00332594								SNX [mV]	-80	1	1	1	1	1	1	1	1
	1080	465	56.9444			-50	0.0196301	0.0308341	0.00968723	0.0114558	0.00970804	0.0325474	0.0613183									-70	0.835772	0.747146	0.879426	0.842	0.944099	0.826923	0.970537	0.810345
	650	350	46.1538			-40	0.0274579		0.0224096	0.0119093	0.0186346	0.0798463	0.0690466									-60	0.4905	0.5485	0.590683	0.515385	0.738302	0.54023
	665	348	47.6692			-30	0.035639	0.0753721				0.094373	0.0619857									-50	0.274077	0.334646	0.122531	0.20035	0.100022	0.223077	0.414211	0.227011
	1070.4	493	53.9425			-20	0.119695	0.104296	0.0625502		0.113798	0.219466	0.152106									-40	0.0595772	0.0496894	0.130769	0.211438	0.0718391
	658.571	343.857	47.7874			-10	0.216312	0.503432	0.449034	0.343334	0.519231	0.506189	0.618118									-30	0.00444543	0.05	0.0641248	0.0287356
	631.083	359.714	43.0005			0	0.647793	1.10435	0.879518	1.05394	0.771577	1.11448	0.925055									-20	0.0269231	0.00693241	0
	573.85	404.75	29.4676			10	1.03527	1.10147	0.749665	0.854415		1.06274	0.822284									-10	0
	394.5	285.5	27.6299			20	1	1	1	1	1	1	1
n-number	20	20	20
mean	528.855	313.187	40.8437
standard deviation	256.891	145.777	17.3818
standard error	57.4426	32.5967	3.8867				CTRL					SNX											CTRL					SNX
							mean	standard dev	standard err	n cells		mean	standard dev	standard err	n cells								mean	standard dev	standard err	n cells		mean	standard dev	standard err	n cells
cells (n):	20	20	20			-60	0.00496514	0.00624098	0.00166797	14		0.00975631	0.00915464	0.00346013	7							-80	1	0	0	15		1	0	0	8
preparations (N):	4	4	4			-50	0.0216895	0.0175009	0.00467732	14		0.0250258	0.0186664	0.00705525	7							-70	0.902738	0.106479	0.0274927	15		0.857031	0.0725109	0.0256365	8
						-40	0.04043	0.0338171	0.009038	14		0.0382174	0.0287216	0.0117255	6							-60	0.752303	0.174258	0.0449933	15		0.5706	0.0887723	0.0362412	6
						-30	0.090429	0.070127	0.0187422	14		0.0668425	0.0246842	0.0123421	4							-50	0.55907	0.237871	0.0635737	14		0.236991	0.104072	0.0367949	8
Ctrl = control						-20	0.231254	0.202078	0.0540077	14		0.128652	0.0530299	0.0216494	6							-40	0.362878	0.210871	0.0563578	14		0.104663	0.0674811	0.0301784	5
						-10	0.617507	0.265444	0.070943	14		0.450807	0.132321	0.0500126	7							-30	0.206209	0.154518	0.0446055	12		0.0368265	0.0260303	0.0130152	4
						0	0.96615	0.112089	0.0373628	9		0.928102	0.176578	0.0667401	7							-20	0.076735	0.113601	0.040164	8		0.0112852	0.0139794	0.00807099	3
						10	1.01981	0.161602	0.0466503	12		0.937641	0.146691	0.0598862	6							-10	0	0	0	2		0	0	0	1
						20	1	0	0	14		1	0	0	7
																									#NAME?
